1  
2  
3  
4  
5  
6  
7  
8  
9  
10  
11  
12  
13  
14  
15  
16  
17  
18  
19

**Structural rearrangement of TFIIIS- and TFIIIE/TFIIIF-like subunits in  
RNA polymerase I transcription complexes**

**Lucas Tafur<sup>1, 2</sup>, Yashar Sadian<sup>1</sup>, Rene Wetzel<sup>1</sup>, Felix Weis<sup>1</sup> & Christoph W.  
Müller<sup>1\*</sup>**

<sup>1</sup>European Molecular Biology Laboratory (EMBL), Structural and Computational  
Biology Unit,  
Meyerhofstrasse 1, 69117 Heidelberg, Germany.

<sup>2</sup>Joint PhD degree from EMBL and Heidelberg University, Faculty of Biosciences

\* Corresponding author. Tel +49 6221 387 8320; E-mail: [cmueller@embl.de](mailto:cmueller@embl.de)

20 **Abstract**

21 RNA polymerase (Pol) I is a 14-subunit enzyme that solely transcribes pre-ribosomal RNA.  
22 Cryo-EM structures of Pol I initiation and elongation complexes have given first insights into  
23 the molecular mechanisms of Pol I transcription. Here, we present cryo-electron microscopy  
24 structures of yeast Pol I elongation complexes (ECs) bound to the nucleotide analog  
25 GMPCPP at 3.2 to 3.4 Å resolution that provide additional insight into the functional interplay  
26 between the TFIIIE/TFIIF-like A49-A34.5 heterodimer and the TFIIIS-like subunit A12.2  
27 present in Pol I. Strikingly, most of the nucleotide-bound ECs lack the A49-A34.5  
28 heterodimer and adopt a Pol II-like conformation, in which the A12.2 C-terminal domain is  
29 bound in a previously unobserved position at the A135 surface. Our work suggests a  
30 regulatory mechanism of Pol I transcription where the association of the A49-A34.5  
31 heterodimer to Pol I is regulated by subunit A12.2, thereby explaining *in vitro* biochemical  
32 and kinetic data.

33

## 34 Introduction

35 Eukaryotic gene transcription is carried out by three different RNA polymerases (Pol). Pol I  
36 only transcribes pre-ribosomal RNA, which is subsequently cleaved into mature rRNAs in a  
37 complex process directly coupled to transcription (Schneider et al., 2007). In recent years,  
38 structural information available for *Saccharomyces cerevisiae* (yeast) Pol I has increased  
39 dramatically. Since the crystal structure of unbound Pol I was published in 2013 (Engel,  
40 Sainsbury, Cheung, Kostrewa, & Cramer, 2013; Fernandez-Tornero et al., 2013), cryo-EM  
41 structures of initiation (Engel et al., 2017; Engel, Plitzko, & Cramer, 2016; Han et al., 2017;  
42 Pilsl et al., 2016; Sadian et al., 2017) and elongation (Neyer et al., 2016; Tafur et al., 2016)  
43 complexes have become available. These structures revealed that while the Pol I initiation  
44 complexes greatly diverge from their Pol II (Plaschka et al., 2016) and Pol III (Abascal-  
45 Palacios, Ramsay, Beuron, Morris, & Vannini, 2018; Vorlander, Khatter, Wetzel, Hagen, &  
46 Muller, 2018) counterparts (suggesting a specific adaptation towards rDNA recruitment and  
47 transcription), the active Pol I enzyme adopts a conserved post-translocated conformation  
48 (in which the active site is free to bind the incoming NTP) as also observed in Pol II  
49 (Kettenberger, Armache, & Cramer, 2004) and Pol III (Hoffmann et al., 2015). In particular, in  
50 comparison with the apo Pol I crystal structure, the DNA-binding cleft is completely closed,  
51 the bridge helix adopts a fully folded conformation and the A12.2 C-terminal domain is  
52 excluded from the active site.

53 Compared to 12-subunit Pol II, 14-subunit Pol I and 17-subunit Pol III apparently  
54 incorporated transcription factor-like subunits during evolution (Khatter, Vorlander, & Muller,  
55 2017; Vannini & Cramer, 2012). In Pol I, the A49-A34.5 heterodimer (hereafter referred as  
56 “heterodimer”) has been proposed to function as both a TFIIIE- and TFIIIF-like factor,  
57 participating during transcription initiation and elongation (Khatter et al., 2017; Vannini &  
58 Cramer, 2012). While the A49 C-terminal tandem winged helix domain (tWH) has structural  
59 homology to TFIIIE, the N-terminal A49 dimerization domain, together with the A34.5 subunit,  
60 form a triple  $\beta$ -barrel structure that resembles the Rap74/30 module of TFIIIF (Geiger et al.,  
61 2010). In accordance with its proposed TFIIIE-like function, the A49 tWH has been observed  
62 bound to upstream DNA during initiation (Engel et al., 2017; Han et al., 2017) and in an  
63 elongation state with short RNA (Tafur et al., 2016). However, this domain is flexible and not  
64 seen when the transcription scaffold contains longer RNAs or in the absence of nucleic  
65 acids. The heterodimer is anchored to the core enzyme by interactions between the A49-  
66 A34.5 dimerization domain with the N-terminal domain of A12.2, the A135 lobe, and by an  
67 extended surface between the long C-terminal tail of A34.5 (A34.5-Ct) and the A135 surface  
68 (Engel et al., 2013; Fernandez-Tornero et al., 2013). The A34.5-Ct forms the largest  
69 interaction surface and (like A49) is essential for stable binding of the heterodimer to Pol I *in*

70 *vivo* (Gadal et al., 1997) and *in vitro* (Geiger et al., 2010). Accordingly, Pol I purified from an  
71 *rpa34-Δ* yeast strain lacks A49 (Gadal et al., 1997), and that purified from a strain with a  
72 deletion of A49 lacks A34.5 (Pilsl et al., 2016).

73 Since its discovery, Pol I has been shown to exist in two different conformations that differ by  
74 the presence of the heterodimer, which can be reversibly dissociated (Huet, Buhler,  
75 Sentenac, & Fromageot, 1975). The form lacking A49-A34.5, termed Pol I\*, has reduced  
76 transcriptional specificity and activity compared to the complete Pol I enzyme (Huet et al.,  
77 1976). Interestingly, Pol I\* is also more sensitive to inhibition by  $\alpha$ -amanitin (Huet et al.,  
78 1975). Neither A49 (Liljelund, Mariotte, Buhler, & Sentenac, 1992) nor A34.5 (Gadal et al.,  
79 1997) are essential genes, and Pol I\* has been proposed to co-exist with Pol I *in vivo* (Gadal  
80 et al., 1997). Deletion of topoisomerase I causes a very strong growth defect in yeast only  
81 when combined with a deletion of A34.5 (Gadal et al., 1997), suggesting that A34.5 is  
82 important for relieving topological stress during rDNA transcription. *In vitro*, the heterodimer  
83 has a stronger effect on promoter-dependent transcription than on non-specific transcription,  
84 which depends entirely on the presence of the A49 tWH (Pilsl et al., 2016). When using a  
85 transcription bubble or a minimal nucleic acid scaffold (neither of which needs strand  
86 opening), the absence of heterodimer affects primarily the processivity of the enzyme (the  
87 ability to transcribe the entire transcript) (Geiger et al., 2010; Kuhn et al., 2007). Interestingly,  
88 in the mammalian system, the association of the PAF53-PAF49 heterodimer (the human  
89 ortholog of A49-A34.5) to the Pol I core is regulated by the nutrient status of the cell,  
90 whereby upon nutrient starvation the PAF53-PAF49 heterodimer dissociates from Pol I and  
91 is depleted from the nucleolus (Penrod, Rothblum, Cavanaugh, & Rothblum, 2015). Overall,  
92 the data suggests that the heterodimer is functionally important for transcription initiation  
93 and/or elongation. However, the functional and physiological relevance of Pol I\* has not  
94 been elucidated to date.

95 A12.2 is another Pol I-specific subunit which shares homology with Pol II subunit Rpb9 (in its  
96 N-terminal domain) and Pol II transcription factor TFIIS (in its C-terminal domain). While the  
97 role of TFIIS in RNA cleavage is well established (Cheung & Cramer, 2011), Rpb9 appears  
98 to regulate transcription elongation (Hemming et al., 2000), proofreading (Knippa &  
99 Peterson, 2013) and transcription-coupled DNA repair (Li, Ding, Chen, Ruggiero, & Chen,  
100 2006). The A12.2 C-terminal Zn ribbon domain (A12.2C) is required for the Pol I intrinsic  
101 RNA cleavage activity (Kuhn et al., 2007) and adopts a similar position as TFIIS in the cleft  
102 in unbound (apo) Pol I (Engel et al., 2013; Fernandez-Tornero et al., 2013; Neyer et al.,  
103 2016) (as well as in Pol I bound only to DNA (Sadian et al., 2017; Tafur et al., 2016)), but is  
104 excluded from the active site upon formation of the EC (Neyer et al., 2016; Tafur et al.,  
105 2016). Its exact position, however, has not been determined in the context of an actively

106 transcribing complex. While deletion of the A12.2C does not cause any growth defect,  
107 deletion of the A12.2 N-terminal Zn ribbon domain (A12.2N) produces a similar effect as  
108 deletion of the complete protein (growth defect at 34°C, synthetic lethality when combined  
109 with A14 deletion, and strong sensitivity towards 6-azauracil and mycophenolate) (Van  
110 Mullem, Landrieux, Vandehaute, & Thuriaux, 2002). Interestingly, deletion of either the  
111 complete A12.2 or A12.2N also alters the nucleolar localization of Pol I, suggesting that  
112 A12.2 is important for Pol I integrity.

113 Studies to date suggest a functional interplay between the Pol I heterodimer and subunit  
114 A12.2. The heterodimer stimulates A12.2-mediated RNA cleavage *in vitro* (Geiger et al.,  
115 2010), the latter which is important for Pol I backtrack recovery (Lisica et al., 2016). A12.2N  
116 interacts directly with the dimerization domain of A49, thus stabilizing the anchoring of the  
117 heterodimer (Engel et al., 2013; Fernandez-Tornero et al., 2013). Recently, A12.2 has also  
118 been proposed to be important for transcription initiation *in vivo* and *in vitro*, especially in the  
119 absence of A49 (Darrière T, 2018). Therefore, it is likely that both A49-A34.5 and A12.2  
120 increase the processivity of the enzyme *in vivo*.

121 While the Pol I elongation complex (EC) greatly resembles Pol II and Pol III ECs, some  
122 elements in the active site appear to be positioned differently in Pol I, including two loops  
123 (loop A and loop B) from the A135 lobe that come close to the non-template (NT) single  
124 strand (ssNT) in the transcription bubble. Interestingly, even though most residues near the  
125 active site are conserved between the three Pols, mutations in some of these appear to have  
126 opposite effects in Pol I and Pol II *in vitro* (Viktorovskaya et al., 2013). These results suggest  
127 that there might be differences in the active site that could be observed in other EC  
128 intermediates or in a pre-translocated state, in which the nucleotide binding site (“A” site) is  
129 occupied by the incoming NTP substrate. Additionally, both the A12.2 subunit and the A49-  
130 A34.5 heterodimer might play active roles during elongation that have not been structurally  
131 characterized to date.

132

## 133 **Results**

### 134 **Cryo-EM structures of the GMPCPP-bound Pol I elongation complex (EC)**

135 In order to better understand the catalytic mechanism of Pol I, we incubated the Pol I EC  
136 with the non-hydrolysable NTP analog GMPCPP as previously used for Pol II (Kettenberger  
137 et al., 2004; Wang, Bushnell, Westover, Kaplan, & Kornberg, 2006). The Pol I EC was  
138 prepared as previously described (Tafur et al., 2016), except that 1 mM of MgCl<sub>2</sub> was  
139 included in the buffer (Material and Methods). 5,768 micrograph movies were collected on a  
140 FEI Titan Krios equipped with a K2 direct electron detector, and processed with RELION 2.0

141 (Kimanius, Forsberg, Scheres, & Lindahl, 2016). After sorting particles with 2D and 3D  
142 classification, an unexplained extra density next to the A135 surface was observed in most  
143 of the particles with a closed cleft and strong DNA-RNA density, concomitant with streaky  
144 and weak density for the A49-A34.5 heterodimer. To better resolve this density, particles  
145 were classified using a mask in this region (Fig. 1-Figure Supplement 1). This revealed that  
146 the extra density corresponded to A12.2C (Fig. 1). In total 63% of all particles selected after  
147 the first unmasked 3D classification step did not have the heterodimer bound and showed  
148 density for A12.2C in this new position (named Pol I\* (Huet et al., 1975)), while only 37%  
149 represented the 14-subunit Pol I. Extensive 3D classification ultimately yielded two different,  
150 nucleotide bound ECs (referred throughout the text simply as ECs): 12-subunit Pol I\* EC  
151 lacking the heterodimer, which was refined to 3.18 Å resolution, and 14-subunit Pol I EC,  
152 which was refined to 3.42 Å resolution. The overall conformation of both Pol I forms is very  
153 similar, with the exception of the presence/absence of the heterodimer and a slight  
154 difference in the conformation of the clamp, and resembles previously published structures  
155 (Figure 1-Figure Supplement 3) (Neyer et al., 2016; Tafur et al., 2016).

156 Interestingly, an apo Pol I\* reconstruction at 3.21 Å resolution was obtained with a similar  
157 conformation as previously observed for the cryo-EM structures of monomeric Pol I (Neyer  
158 et al., 2016; Pilsl et al., 2016), highlighting that the presence of the heterodimer does not  
159 impose any conformational constraints on the Pol I core. In this reconstruction, the bridge  
160 helix is unfolded, the cleft is only partially closed and the DNA-mimicking loop is excluded  
161 from the active site (Fig. 1-Figure Supplement 4). At present it is unclear why most of the  
162 particles lack the heterodimer compared to previous Pol I EC structures (Neyer et al., 2016;  
163 Tafur et al., 2016), but it is possible that the presence of GMPCPP promoted the exclusion of  
164 the heterodimer, thus favoring the equilibrium towards the Pol I\* EC in the sample.

165 Models were built using previous Pol I structures as a starting point and were real-space  
166 refined, yielding structures with excellent stereochemistry (Table 1). The structures obtained  
167 in this work reveal: (1) a previously unobserved position of A12.2C not compatible with A49-  
168 A34.5 heterodimer binding, (2) the position and interactions of the incoming NTP substrate in  
169 the active site, and (3) the stabilization of the downstream end of the transcription bubble by  
170 flipping of the +2 base and stacking of the +1 base of the non-template strand.

171

## 172 **The A12.2 C-terminal domain alternates between a TFIIIS-like and an Rpb9-like** 173 **position**

174 In the complete, 14-subunit Pol I EC, the A12.2C is disordered and only density up to  
175 residue 67 is observed, as previously described (Neyer et al., 2016; Tafur et al., 2016). In

176 the Pol I\* EC, however, the A12.2C is anchored to the enzyme by interactions with the A135  
177 External Domain 1 (ED1) in a novel position that overlaps with the A34.5 C-terminal tail  
178 (A34.5-Ct) in the Pol I EC, and which is similar to the position of the C-terminal domain of  
179 Pol II subunit Rpb9 (Rpb9C) (Fig. 1A, see below). A12.2N and A12.2C are connected by a  
180 flexible linker that is weakly resolved in the Pol I\* EC, although not at sufficient resolution for  
181 model building but further validating the assignment of this density (Figure 1-Figure  
182 Supplement 3). Interestingly, additional density is observed from the A190 jaw domain that  
183 connects to the DNA-mimicking loop (DML) towards the A12.2 linker, suggesting that the  
184 DML might also contribute to this positioning of the A12.2C (Figure 1-Figure Supplement 3).

185 Comparison of Pol I\* with Pol I reveals that two interfaces in the A135 surface are differently  
186 arranged (Figure 1B). In addition to the interaction with the ED1, which mutually exclusive  
187 binds either A34.5-Ct or A12.2C, residues 989 to 1000 from the A135 Hybrid Binding domain  
188 (HB) interact with either the A34.5-Ct or the A135 N-terminal tail (A135-Nt), which folds back  
189 towards the HB in Pol I\* (Figure 1B, C). The A135-Nt effectively acts as a switch, changing  
190 its positioning to allow or to prevent A34.5-Ct binding to the HB. Such a movement is only  
191 possible because the first helix of A135 is permanently associated with parts of AC40, A135  
192 and Rpb10, and only the flexible tail (residues ~1-18) can move freely. The A12.2C can  
193 alternate between the previously observed TFIS-like and the Rpb9-like position by rotating  
194 around a hinge located at residues 66-67, just after the well-ordered helix inserted between  
195 the funnel and jaw (A12 residues 59-65) (Fig. 1C, middle).

196 Both A12.2C and A34.5-Ct interact with two asparagine residues in the ED1 (A135 N683  
197 and N684) through a tyrosine residue (A12.2 Y96; A34.5 Y150). A12.2C interacts with N683  
198 and N684 through Y96, and with N684 through A12.2 T98 (Fig. 1D, top). On the other hand,  
199 A34.5 Y150 interacts with N684, and the neighboring R154 with N683 (Fig. 1D, bottom). A  
200 similar situation is observed in the HB interaction surface. In Pol I, A34.5 R157 is close to  
201 residues A135 N989 and N990 (Fig. 1E, bottom). In the Pol I\*, R157 is partially replaced by  
202 A135 R12, which comes near residue N990 (Fig. 1E, top). Thus, two interaction surfaces of  
203 A34.5-Ct with A135 are exchanged in Pol I\* with A12.2C (ED1) and the A135-Nt (HB), which  
204 interact with the same residues from A135. These interactions preclude the binding of the  
205 heterodimer when A12.2C adopts the Rpb9-like position.

206 In the monomeric apo Pol I, in which the cleft is partially closed, A12.2C can still occupy the  
207 TFIS-like position (Neyer et al., 2016). However in the apo Pol I\*, A12.2C is stably bound to  
208 the Rpb9-like position, although there is sufficient space for accommodating A12.2C in the  
209 TFIS-like position (Fig. 1-Figure Supplement 4). The presence of the heterodimer in the  
210 enzyme could thus promote binding of A12.2C to the TFIS-like site (when accessible) by

211 blocking the Rpb9-like binding site. Comparison of apo Pol I with apo Pol I\* reveals that the  
212 change in the position of A12.2C also shifts A12.2N by  $\sim 3$  Å towards the jaw, and part of the  
213 latter appears to move towards the linker, likely to stabilize its position (Fig. 1-Figure  
214 Supplement 4). Interestingly, both domains move relative to the region that contributes the  
215 fifth  $\beta$ -sheet to the jaw (resides  $\sim 43$ -66), which fixes A12.2 to the Pol I core. Therefore, the  
216 movement of both, the A12.2N and the jaw, accommodate the change in the position of  
217 A12.2C.

218

### 219 **The structure of the ED1 determines binding of the C-terminal domain of the Rpb9-like** 220 **subunit in Pol I, Pol II and Pol III**

221 Comparison of the Pol I/Pol I\* structures with Pol II and Pol III reveals that while the ED2  
222 appears to be structurally more conserved, the Pol I ED1 diverges from its Pol II and Pol III  
223 counterpart, as it is smaller and lacks an extension that overlaps with A12.2C in the Rpb9-  
224 like position (Fig. 2A). In Pol II, Rpb9C also binds the ED1, although in a different manner  
225 consistent with the structure of the Pol II ED1 (Fig. 2B). Therefore, Pol I and Pol II ED1 are  
226 specifically tailored to bind A12.2C and Rpb9C, respectively. Interestingly, a similar situation  
227 is observed in Pol III, where the ED2 is more structurally conserved than the ED1 (Fig. 2C).  
228 The Pol III ED1, as in Pol II, has an extension in the region where A12.2C binds, but the  
229 Rpb9C would also clash with an N-terminal helix from subunit C53. Accordingly, Pol III C11C  
230 (equivalent to Pol I A12.2C and Pol II Rpb9C) adopts a position near the jaw that differs from  
231 the position of both A12.2C and Rpb9C (Hoffmann et al., 2015) (Fig. 2C).

232 Further analysis of this region shows that the N-terminal tail of the Pol II second largest  
233 subunit (Rpb2), that forms part of the Rpb2 ED1 domain, is positioned similarly to the N-  
234 terminal region of C128, the corresponding Pol III subunit. The Pol I A135-Nt, however, is  
235 retracted and interacts with the HB domain as described previously, while in the presence of  
236 the heterodimer it remains distant from the A135 EDs but moves away from the HB. This  
237 positioning allows binding of A12.2C to the ED1 and also controls the accessibility of the HB  
238 to the A34.5-Ct.

239 In conclusion, the A12.2C can only bind to the Rpb9-like position because of the distinct  
240 structure of the A135 ED1 and the different positioning of the A135-Nt. Heterodimer release  
241 and binding of A12.2C to the ED1 induce a conformational change in Pol I, which adopts a  
242 conformation resembling Pol II.

243

244



## 245 **NTP selection and discrimination are conserved among RNA polymerases**

246 To better resolve smaller differences in the Pol I active site, particles from both EC  
247 reconstructions were pooled, and classification was restricted to the core enzyme and the  
248 DNA-RNA hybrid using a soft mask and higher weight on the data (Scheres, 2016) (Fig. 1-  
249 Figure Supplement 1, Material and Methods). This strategy allowed us to better resolve part  
250 of the partially “closed” trigger loop (TL), the path of the non-template strand in the  
251 transcription bubble (including the interactions on the downstream edge of the bubble), and  
252 the position and interactions of GMPCPP in the active site.

253 The NTP substrate is positioned in the “A” site, as previously seen in Pol II (Cheung,  
254 Sainsbury, & Cramer, 2011; Wang et al., 2006; Westover, Bushnell, & Kornberg, 2004) and  
255 bacterial RNA polymerase (bcPol)(Vassylyev et al., 2007) (Fig. 3A). Accordingly, the  
256 phosphate moiety is bound by two invariant arginine residues (A135 R714 and R957). In  
257 addition, two invariant residues N625 and R591, which are involved in NTP/dNTP  
258 discrimination, come close to the 3'- and 2'-OH group, respectively. While the corresponding  
259 residue to N625 in Pol II (Rpb1 N479) has been shown to interact with either the 3'-OH  
260 (Wang et al., 2006) or the 2'-OH (Cheung et al., 2011) group, the invariant R591 (Rpb1  
261 R446) interacts with the 2'-OH group of the ribose in all Pol II structures. In addition, the NTP  
262 is maintained in the correct position by L1202 from the TL, which interacts with the  
263 guanosine base. Only up to this residue, weak density can be observed, while the “tip” loop  
264 (residues 1203-1212) is unresolved.

265

## 266 **Transcription bubble stabilization in Pol I**

267 In the previous Pol I EC structures, the downstream DNA and the DNA-RNA hybrid adopted  
268 a conserved position compared to Pol II and Pol III (Neyer et al., 2016; Tafur et al., 2016).  
269 Additionally, the upstream DNA duplex was bound similar to the bovine Pol II (Bernecky,  
270 Herzog, Baumeister, Plitzko, & Cramer, 2016), but not to the available yeast Pol II structure  
271 (Barnes et al., 2015). In contrast to our previous data set<sup>9</sup>, the upstream DNA duplex is  
272 more flexible, but density could be improved by focused classification of the pooled Pol I\*  
273 and Pol I ECs (Fig. 1-Figure Supplement 1). Two main classes were obtained that differed in  
274 the conformation of the rudder. One of them showed strong upstream DNA duplex density  
275 as well as density for the single-stranded non-template region (ssNT). While the lower  
276 resolution in this area precluded DNA sequence assignment and model building, continuous  
277 density from both ends of the transcription bubble delineate the path of the ssNT in the cleft  
278 (Fig. 1B, Fig. 4A). As suggested previously (Tafur et al., 2016), the ssNT strand follows a  
279 different path compared to the available structure of yeast Pol II (Barnes et al., 2015).

280 Although the ssNT density is clear, it is too short to accommodate all nucleotides between  
281 the transcription bubble boundaries. Additionally, the density becomes bulky near the rudder,  
282 suggesting that the ssNT strand wraps around the rudder or that it is in a strained  
283 conformation (Fig. 4-Figure Supplement 1). Altogether, these results suggest that the ssNT  
284 strand in the transcription bubble is dynamic and interacts intimately with the rudder. As the  
285 mismatch of 11 nucleotides was artificially induced into the transcription bubble, it is possible  
286 that the naturally occurring transcription bubble in active Pol I is shorter, although it is able to  
287 accommodate larger mismatches as other RNA polymerases (Barnes et al., 2015; Pal,  
288 Ponticelli, & Luse, 2005).

289 While the A135 protrusion positive helix and the wedge interact and stabilize the upstream  
290 DNA duplex, the rudder physically blocks the direction of the DNA duplex, defining the  
291 upstream boundary of the transcription bubble (Fig. 4A). The fork loop 1 (FL1) is tilted down  
292 towards the A135 lobe and forms an “upstream arch” with loop A, which physically restricts  
293 the passage of the ssNT strand (Fig. 4B). In contrast, in Pol II, the “upstream arch” is  
294 composed of the rudder and the FL1 (Barnes et al., 2015) and is differently configured (Fig.  
295 4C). The corresponding region to loop A (Rpb2 residues 269-282) is retracted, allowing the  
296 positioning of the ssNT strand in between this region and the “upstream arch”. In Pol I, the  
297 configuration of the “upstream arch” only allows the positioning of the ssNT strand in a space  
298 in between the FL1, loop A and the rudder. In the context of the 14-subunit Pol I, further  
299 restriction of the allowable position of the ssNT strand is enforced by the A49 linker helix that  
300 spans the cleft (Fig. 4A, B).

301 In Pol II, the downstream edge of the bubble is determined by the FL2, which similarly to the  
302 FL1, can alternate between “open” and “closed” states (Barnes et al., 2015). When the FL2  
303 is in an “open” conformation, the +2 base of the ssNT strand is flipped (Cheung & Cramer,  
304 2011) (Fig. 4-Figure Supplement 2). In the yeast Pol II structure with a complete transcription  
305 bubble, however, the FL2 adopts a “closed” conformation, and shifts the position of the +2  
306 base in the ssNT strand (Barnes et al., 2015) (Fig. 4-Figure Supplement 2). In bcPol,  
307 nucleotide +2 from the ssNT strand is flipped and inserted into a pocket formed by residues  
308 from the  $\beta$  subunit (“ $\beta$  pocket”) (Zhang et al., 2012). Interestingly, in the Pol I EC, the +2  
309 nucleotide is also flipped into a narrow pocket (“A135 pocket”) formed by loop B and the  
310 FL2, which is in an “open” conformation (Fig. 4D). While residues from the FL2 face the  
311 flipped base, loop B exposes positively charged residues to the nucleobase accommodated  
312 in the pocket. In particular, R219 and R225 appear to stabilize the flipped +2 base,  
313 promoting the stacking of the +1 base with F508 (from FL2) (Fig. 4E, top). The interaction of  
314 the +1 base with F508 is reminiscent of the interaction of the same base with W183 of  
315 subunit  $\beta$  of bcPol (Zhang et al., 2012) (Fig. 4E, bottom). In both bcPol and Pol I, the

316 interactions with the +1 and +2 nucleotides appear to stabilize and direct the ssNT strand in  
317 the cleft. Additionally, the highly conserved D395 also interacts with the +2 base as in bcPol  
318 ( $\beta$ D446) (Vvedenskaya et al., 2014) and Pol II (Rpb2 D399) (Cheung & Cramer, 2011), and  
319 probably also in Pol III (C128 D370). F508 is not conserved in the FL2 of Pol II but is present  
320 in the Pol III FL2 (C128 F477). However, neither Pol II nor Pol III can form the equivalent  
321 interactions as in the A135 pocket because their corresponding loop B is differently  
322 positioned and far from the +1 and +2 bases.

323 Classification of the pooled consensus ECs (Fig. 1-Figure Supplement 1) by the  
324 conformation of the core revealed a continuum of states in which the +2 base was either not  
325 flipped (when the cleft was slightly more open) or flipped (when the cleft was completely  
326 closed) (Fig. 4-Figure Supplement 3). Interestingly, flipping of the +2 base was only  
327 observed when the jaw and clamp domains rotated relative to each other before the  
328 complete closure of the cleft and coinciding with DNA-RNA hybrid stabilization, stable  
329 binding of the NTP and partial TL closing (transition from state 3 to 4 in Fig. 4-Figure  
330 Supplement 3; Video 1). Thus, +2 base flipping only occurs when the complex is correctly  
331 positioned for catalysis. The variability in the position of this base could also explain why in  
332 previous Pol I EC structures, in addition to the lower resolution and lower number of  
333 particles, this base was modelled unflipped (Tafur et al., 2016) or not modelled (Neyer et al.,  
334 2016). Strikingly, comparison of these reconstructions shows that formation of the final EC  
335 requires the concerted, sequential movement of different domains (Video 2). Upon DNA-  
336 RNA binding, the protrusion and wall domains move towards the clamp, followed by the  
337 jaw/clamp movement that promotes +2 base flipping and finally closing of the cleft by  
338 movement of the complete modules 1 and 2.

339

## 340 Discussion

341 After the crystal structure of the Pol I dimer was published (Engel et al., 2013; Fernandez-  
342 Tornero et al., 2013), the active enzyme in its initiating (Engel et al., 2017; Han et al., 2017;  
343 Sadian et al., 2017) and elongating (Neyer et al., 2016; Tafur et al., 2016) forms have been  
344 solved by cryo-EM. While the general arrangement of subunits is similar in all  
345 reconstructions, one of the main differences between them is the position of A12.2C. In the  
346 active form of the enzyme, A12.2C is excluded from the active site, but its alternative  
347 position could not be determined. Here, we show that A12.2C can alternate between TFIS-  
348 like and Rpb9-like positions, partially depending on the presence of the heterodimer. In the  
349 TFIS-like position, A12.2C is in the cleft and occludes the active site, thus being  
350 incompatible with NTP incorporation. When the cleft is closed (and thereby clashes with  
351 A12.2C in the TFIS-like position), A12.2C is excluded from the active site and can bind to a  
352 distinct site near the A135 EDs. Binding to the ED1 requires the release of the heterodimer  
353 in the complex, as both the A12.2C and the A34.5-Ct bind to the ED1 using overlapping  
354 binding sites. Release of the heterodimer is also promoted by the movement of the A135-Nt  
355 towards the HB, which blocks the interaction of the distal part of the A34.5-Ct with this  
356 domain. These results suggest a mechanism by which the surface of A135 (in particular, the  
357 ED1) plays a pivotal role in specific factor exchange in Pol I. It appears that in both Pol I and  
358 Pol II, the configuration of the ED1 is such that it can only accommodate their respective  
359 Rpb9-like C-terminal domain, although in different binding modes. In contrast, in Pol III, the  
360 presence of C53 prevents the binding of C11C to the C128 ED1, favoring its positioning near  
361 the jaw. In addition, while in both Pol II and Pol III the N-terminal region of the second  
362 biggest subunit is part of the ED1, in Pol I this flexible tail is located distant from the ED1 and  
363 functions as a switch which alternates its position depending on the presence or absence of  
364 the A34.5-Ct. In combination with the binding of A12.2C to the ED1, the interaction of the  
365 A135- Nt with the HB “seals” two of the three main binding interfaces of A34.5-Ct with Pol I  
366 (the third being the anchoring of the very end of A34.5 to a cavity formed by A135, AC40 and  
367 Rpb10). Therefore, in Pol I\*, the heterodimer is excluded from the enzyme and Pol I adopts  
368 a Pol II-like conformation.

369 Our results show that Pol I can adopt an active conformation (with a stable DNA-RNA hybrid,  
370 +2 base flipped and the NTP in the active site) in the absence of the heterodimer. With our  
371 data, however, it is not possible to discern whether the heterodimer is excluded before or  
372 after formation of this complex. Based on the extensive interaction surface between the  
373 A34.5-Ct and A135, it is likely that the heterodimer dissociates after the formation of a stable  
374 EC, which allows A12.2C binding to the ED1. Recent genetic studies have suggested that  
375 A12.2 may be also involved in modulation of the movement of the jaw/lobe interface

376 especially in the absence of A49, as the linker and tWH domains appear to stabilize the  
377 closed conformation of Pol I when bound to DNA (Darrière T, 2018). As the A12.2C binds to  
378 the A135 ED1, which sits next to the A135 lobe, the A12.2C might restrict the movement of  
379 the lobe. Thus, while A12.2N regulates the flexibility of the jaw, A12.2C can additionally  
380 regulate the movement of the lobe. Together, both A12.2 domains could therefore regulate  
381 cleft opening/closing of Pol I upon DNA binding. Restriction of movement of the A135 lobe  
382 by the A12.2C might be important to maintain the closed state in the absence of A49, as in  
383 Pol I\*. A requirement for the movement of the jaw/lobe during Pol I elongation is further  
384 supported by the fact that +2 base flipping (and subsequent transcription bubble  
385 stabilization) is established only when the jaw and clamp domains move relative to each  
386 other.

387 *In vivo*, heterodimer association to Pol I might offer an additional layer of regulation of rDNA  
388 transcription (Figure 5). The proportion of initiation-competent Pol I molecules in the cell has  
389 been proposed to represent those Pol I particles bound to initiation factor Rrn3 (Milkereit &  
390 Tschochner, 1998). Conversely, the number of Pol I\* particles in the cell could represent a  
391 population of actively transcribing DNA-bound Pol I, but also a pool of readily active Pol I  
392 that can initiate transcription upon heterodimer binding (in contrast to Pol I dimers, which  
393 appear to be a storage form of the enzyme (Torreira et al., 2017)). The number of initiation-  
394 competent Pol I molecules could be thus regulated not only by Pol I homo-dimerization and  
395 association with Rrn3, but also by changes in the heterodimer concentration in the  
396 nucleolus, thereby controlling the ratio of Pol I to Pol I\*. Nutrient-dependent regulation of  
397 nucleolar localization of the mammalian A49-A34.5 homolog PAF53-PAF49 has been  
398 observed (Penrod et al., 2015). PAF49 (A34.5 counterpart) accumulates in the nucleolus in  
399 growing cells but disperses to the nucleoplasm upon serum starvation (Yamamoto et al.,  
400 2004). In yeast, A34.5 is maintained in the nucleolus by its association with A49 (but also  
401 contains a nucleolar localization signal in its C-terminal region), and A49 is required for the  
402 high loading rate of Pol I onto rDNA (Albert et al., 2011). Human PAF53-PAF49 can  
403 substitute the A49-A34.5 heterodimer *in vivo* (Albert et al., 2011), suggesting a conserved  
404 function (and possibly regulation). Regulation of heterodimer binding to Pol I might also  
405 explain why promoter association of Pol I-Rrn3 complexes is low upon nutrient starvation  
406 even when the concentration of such complexes is relatively high (Torreira et al., 2017); the  
407 levels of the heterodimer might further regulate Pol I initiation rates.

408 Interestingly, the release of the heterodimer from the enzyme would also allow the binding of  
409 elongation factors to Pol I. Pol I has been shown to bind Spt5 directly (Viktorovskaya,  
410 Appling, & Schneider, 2011) and its activity is affected by Spt4/5 *in vivo* (Anderson et al.,  
411 2011). In the Pol I EC, canonical binding of Spt4/5 is precluded by the A49 tWH (Tafur et al.,

412 2016), as it occupies a position equivalent to the KOW1-L1 domain of Spt5, and by the A49  
413 linker helix spanning the cleft, which clashes slightly with the N-terminal region of Spt5  
414 (Bernecky, Plitzko, & Cramer, 2017; Ehara et al., 2017). Interestingly, Spt5 interacts  
415 physically and genetically with A49, suggesting a functional interplay between these proteins  
416 (Viktorovskaya et al., 2011). Paf1C, another elongation factor, has also been shown to  
417 stimulate Pol I transcription *in vivo* and *in vitro* (Zhang, Sikes, Beyer, & Schneider, 2009;  
418 Zhang, Smith, Renfrow, & Schneider, 2010). Paf1C binds to Pol II on the outer surface of  
419 subunit Rpb2 (Pol II counterpart of A135), including the Rpb2 ED2 and lobe (Xu et al., 2017).  
420 In this position, it clashes and competes with TFIIF for Pol II binding (Xu et al., 2017).  
421 Heterodimer dissociation from Pol I frees the binding site for both Spt4/5 and Paf1C in a  
422 mechanism that could be akin to the transition from initiation to elongation in Pol II: while  
423 TFIIE (A49 tWH) blocks the Spt4/5 binding site, TFIIF (A49-A34.5 dimerization domain)  
424 occupies the binding site of part of Paf1C (Xu et al., 2017) (Fig. 5-Figure Supplement 1).  
425 Thus, binding of elongation factors is mutually exclusive with the presence of initiation  
426 factors. Therefore, in Pol I, factor exchange during the transition from initiation to elongation  
427 could be accommodated more readily just by the release of the heterodimer and switching to  
428 the Pol II-like Pol I\* form. A similar allosteric transition during promoter escape in Pol I  
429 mediated by the heterodimer, Spt5 and the stalk has been previously proposed (Beckouet,  
430 Mariotte-Labarre, Peyroche, Nogi, & Thuriaux, 2011).

431 Given the conservation of residues in the active site among RNA polymerases, similar  
432 binding of the NTP as previously observed in Pol II (Wang et al., 2006; Westover et al.,  
433 2004) and bcPol (Vassilyev et al., 2007) was expected. Accordingly, in our structures,  
434 GMPCPP is positioned in the “A” site by two invariant arginines (A135 R714 and R957),  
435 which interact with the phosphate moiety, and by TL residue L1202 which stacks with the  
436 base. These interactions stabilize the base pairing of the incoming NTP with the +1  
437 nucleotide, promoting NMP incorporation. Stabilization of the NTP in the Pol I active site by  
438 L1202 (Huang et al., 2010) suggests that, as in Pol II, the TL effectively “seals” the active  
439 site and acts as a “positional catalyst” (Mishanina, Palo, Nayak, Mooney, & Landick, 2017).  
440 In addition, both conserved N625 and R591 are positioned close to the 2' and 3'-OH groups,  
441 in agreement with their role on NTP/dNTP discrimination. Quantum-chemical analysis of  
442 NTP/dNTP discrimination in Pol II has shown that R446 (equivalent to Pol I R591) is critical  
443 (Rossbach & Ochsenfeld, 2017), explaining why its mutation is lethal (Wang et al., 2006).  
444 Altogether, the same set of interactions observed between the NTP and residues from the  
445 active site in Pol II are also observed in Pol I, suggesting a universal mechanism of catalysis.  
446 Interestingly, transient-state kinetic analysis of yeast Pol I transcription has revealed that  
447 upon NTP binding, two different Pol I populations are observed (Appling, Lucius, &

448 Schneider, 2015). Additionally, A12.2 appears to play a role during nucleotide incorporation  
449 which differs from its nucleolytic activity (Appling, Schneider, & Lucius, 2017). Therefore,  
450 these experiments are in agreement with our observations under cryo-EM conditions and  
451 suggest that upon NTP binding, Pol I can conformationally switch to Pol I\*, which in turn  
452 affects the catalytic properties of the enzyme.

453

454 Our structures also reveal how the active, elongating complex stabilizes the transcription  
455 bubble. Of particular interest is the interaction of the +1 and +2 bases with residues from the  
456 FL2 and loop B. In a similar manner to what has been observed in bcPol, the +2 base plays  
457 an important role in stabilization of the transcription bubble at the downstream edge (Zhang  
458 et al., 2012). In bcPol, the +2 base is part of the core recognition element (CRE) and  
459 recognition is base-specific towards a guanine (+2G) (Zhang et al., 2012). Interactions with  
460 the CRE and +2G are important for transcription start site selection (Vvedenskaya et al.,  
461 2016) and stability of the open complex (Zhang et al., 2012), and these interactions appear  
462 to also occur during elongation (Vvedenskaya et al., 2014). Mutation of  $\beta$ D446, which  
463 recognizes the guanine, affects positively or negatively transcriptional pausing, depending  
464 on the nature of the pause (Petushkov, Pupov, Bass, & Kulbachinskiy, 2015; Vvedenskaya  
465 et al., 2014). Conservation of D395 in yeast and bacterial Pols suggests that +2 base flipping  
466 is a conserved mechanism to stabilize the downstream, leading edge of the transcription  
467 bubble. In Pol I, stabilization of the active EC might also be dependent on the extensive  
468 interactions of residues from the A135 pocket with the +2 base, which include, in addition to  
469 D395, R219 and R225 from loop B.

470 The interactions of Pol I with the +1 and +2 base appear to direct the non-template strand  
471 between the A49 linker helix, the rudder and the “upstream arch” composed of FL1 and loop  
472 A. Base stacking of F508 with the +1 nucleotide might be a conserved feature adapted from  
473 bcPol (which uses  $\beta$ W183 to interact with the +1) to direct the ssNT in the cleft. Mutational  
474 analysis of W183 has revealed that it plays a role during the initial steps of RNA synthesis  
475 and during translocation in the *E.coli*  $\sigma^{54}$  system, preventing the formation of short abortive  
476 transcripts (Wiesler, Weinzierl, & Buck, 2013). A similar scenario in Pol I, whereby F508  
477 promotes the synthesis of productive versus abortive transcripts, might stimulate the high  
478 processivity needed due to the high initiation rates on the rDNA. It is tempting to speculate  
479 that equivalent interactions as the CRE-Pol in bacteria also occur during Pol I initiation as  
480 the nature of the +1 (pyrimidine) and +2 (purine) is conserved in the yeast rDNA sequence  
481 and we see similar interactions of Pol I with both bases. A role of these residues during  
482 transcription initiation awaits further structures of Pol I initiation complexes.

483 Given the recent characterization of the pre-initiation machineries in Pol I (Engel et al., 2017;  
484 Han et al., 2017; Sadian et al., 2017), Pol II (He et al., 2016; Plaschka et al., 2016) and Pol  
485 III (Abascal-Palacios et al., 2018; Vorlander et al., 2018), it appears that while the assembly  
486 of the pre-initiation complex is more divergent and specialized, Pol I displays features from  
487 both Pol II and bcPol during elongation, arguing in favor of a universal catalytic mechanism  
488 in RNA polymerases.

489



## 490 **Material and Methods**

### 491 **Pol I EC-GMPCPP complex formation**

492 Endogenous Pol I was purified from yeast cells as previously described (Moreno-Morcillo et  
493 al., 2014). Pol I was incubated with a 38 base pair transcription scaffold containing an 11  
494 nucleotide mismatch bubble and a 20 nucleotide RNA as used previously for formation of the  
495 Pol I EC (Tafur et al., 2016). The complex was incubated for 1 hour at 4°C in 15 mM  
496 HEPES-NaOH (pH 7.5), 150 mM ammonium sulfate, 1 mM MgCl<sub>2</sub>, 1 mM GMPCPP (Jena  
497 Bioscience) and 10 mM DTT. The sample was diluted to ~0.1 mg/mL in the same buffer  
498 immediately before grid freezing.

499

### 500 **Cryo-EM sample preparation**

501 2.5 µL of sample was deposited on a freshly glow-discharged cryo grid (R 2/1 + 2nm carbon,  
502 Quantifoil), incubated for 30 s, and blotted for 3 s (with a blotting force of “3”), at 100%  
503 humidity and 4°C in a Vitrobot Mark IV (FEI). Grids were stored in liquid nitrogen until data  
504 collection.

505

### 506 **Cryo-EM data collection**

507 5,768 micrograph movies were collected on a FEI Titan Krios at 300 keV through a Gatan  
508 Quantum 967 LS energy filter using a 20 eV slit width in zero-loss mode. The movies were  
509 recorded on a Gatan K2 direct electron detector, at a nominal magnification of 135,000x  
510 corresponding to a pixel size of 1.04 Å in super resolution mode, using Serial EM. Movies  
511 were collected in 40 frames with defocus values from -0.75 to -2.5 µM, with a dose of 0.9775  
512 e<sup>-</sup> Å<sup>-2</sup> s<sup>-1</sup> per frame for 16 s.

513

### 514 **Cryo-EM data processing**

515 Movies were aligned, motion-corrected and dose-fractionated using MotionCor2 (Zheng et  
516 al., 2017). Contrast transfer function (CTF) estimation was done using CTFFIND4 (Rohou &  
517 Grigorieff, 2015). All processing steps were performed in Relion 2.0 (Kimanius et al., 2016)  
518 unless otherwise indicated. Resolution estimates reported are those obtained after masking  
519 and B-factor sharpening (Relion post-processing). Data were divided in five batches to  
520 increase processing speed. For each batch, autopicking was followed by a 2D classification  
521 step (with data downsized 5 times) to remove contamination and damaged particles. Good  
522 classes were selected, re-extracted and un-binned, and refined against the Pol I EC (PDB:  
523 5m5x) low pass filtered to 40 Å. Then, a 3D classification step was performed without  
524 alignment. For all batches the same procedure was followed, except for batch 5, in which 3D  
525 classification was performed with data downsized 5 times. Classes were selected based on

526 the width of the cleft, the position of the clamp, and the DNA-RNA scaffold density, and  
527 grouped by similarity. Refinement of the pooled particles with closed cleft and strong DNA-  
528 RNA density revealed an extra density and streaky, weak density for the A49-A34.5  
529 heterodimer. To resolve this region, a masked classification was performed. This yielded a  
530 class with high resolution in the extra density, allowing the unambiguous assignment of the  
531 A12.2 C-terminal domain (A12.2C). Based on these results, all other pooled classes were  
532 classified with a mask on this area. Particles were merged depending on whether they  
533 showed density for the A49-A34.5 heterodimer (Pol I) or the A12.2C without A49-A34.5 (Pol  
534 I\*). During the process, additional bad particles were discarded by global 3D classification  
535 without a mask nor alignment. After refinement of all good particles for Pol I and Pol I\*,  
536 additional classification steps were performed to increase the resolvability of the active site.  
537 For Pol I\* particles, a 3D classification step with a mask on the core and DNA-RNA hybrid  
538 yielded a class (182,488 particles) with a better density for GMPCPP, which could be refined  
539 to 3.18 Å resolution. An apo form of Pol I\* consisting of 73,660 particles was obtained during  
540 a global classification step of the initial subset with a closed cleft and strong DNA-RNA  
541 density, and was refined to 3.21 Å resolution. For the pooled Pol I particles, a global 3D  
542 classification step yielded a class with a closed clamp (EC) and a class bound to DNA-RNA  
543 with a slightly more open clamp. The latter was classified one more round, which gave a  
544 class in an EC conformation. These particles were merged with the EC particles from the  
545 previous 3D classification step, refined (consensus Pol I EC) and classified with a mask on  
546 the core, the full DNA-RNA scaffold and the linker helix of A49, which yielded a class with  
547 strong GMPCPP density (30,232 particles) that was refined to 3.42 Å resolution. As both Pol  
548 I EC and Pol I\* EC reconstructions were very similar in the active site, EC particles were  
549 merged and classified using different masks. Masked classification based on the full DNA  
550 scaffold and rudder produced one class (34,475 particles) with improved density for the  
551 upstream DNA duplex and revealing the path of the single stranded non-template strand  
552 (ssNT), which was refined to 4.0 Å resolution (without post-processing). Classification based  
553 on the core and DNA-RNA scaffold revealed different states differing in the width of the cleft,  
554 base flipping at position +2, presence of the GMPCPP and conformation of the trigger loop  
555 (shown in Fig 4.-Figure Supplement 3). One of these classes (Pol I (core) EC +GMPCPP),  
556 which showed better density for GMPCPP, the +2 base and A190 L1202 was refined to 3.18  
557 Å resolution (54,017 particles). Local resolution was estimated with Blocres (Cardone,  
558 Heymann, & Steven, 2013).

559

## 560 **Model building and refinement**

561 Previous Pol I structures in its apo (PDB: 4c3i and 4c2m) and elongating (PDB: 5m5x) forms  
562 were used as starting models. The initial placement of GMPCPP in the active site was based

563 on its position in a Pol II EC with bound GMPCPP (Wang et al., 2006) (PDB: 2e2j). Initially,  
564 the model for the Pol I (core) EC (+GMPCPP) was built in COOT (Emsley & Cowtan, 2004)  
565 and real-space refined in PHENIX (Adams et al., 2010). This model was then rigid body  
566 fitted in the Pol I\* or Pol I EC (+ GMPCPP) maps in UCSF Chimera, further adjusted in  
567 COOT, and real-space refined again in PHENIX. For Pol I\*, residues 66-125 from A12.2  
568 were taken from the apo crystal structure (PDB: 4c3i), fitted to the density and manually  
569 adjusted. The A12.2 linker region was deleted afterwards. Agreement between maps and  
570 models was estimated in PHENIX. Model quality was assessed with Molprobity(Chen et al.,  
571 2010).

572

### 573 **Accession numbers**

574 Models have been deposited in the PDB with codes: XXX (Pol I (core) EC +GMPCPP), XXX  
575 (Pol I EC +GMPCPP) and XXX (Pol I\* EC +GMPCPP), while cryo-EM maps have been  
576 deposited with codes: XXX (Pol I (core) EC +GMPCPP), XXX (Pol I EC+GMPCPP), XXX  
577 (Pol I\* EC+GMPCPP), XXX (Pol I (core) EC -upstream DNA focus), and XXX (apo Pol I\*).

578

579

### 580 **Acknowledgements**

581 Y.S, L.T, R.W and C.W.M acknowledge support by the ERC Advanced Grant (ERC-2013-  
582 AdG340964-POL1PIC). L.T acknowledges support by the EMBL International PhD program.  
583 We thank Jonas Hanske for discussion and comments on the manuscript.

584

### 585 **Author's contributions**

586 C.W.M initiated and supervised the project. L.T designed and carried out experiments, data  
587 processing and model building. Y.S aided in cryo-EM sample preparation. Y.S and F.W  
588 collected the cryo-EM data, with input from L.T. L.T analysed the data and built the models.  
589 R.W carried out yeast fermentation. L.T and C.W.M prepared the manuscript with input from  
590 all other authors.

591

## 592 References

- 593 Abascal-Palacios, G., Ramsay, E. P., Beuron, F., Morris, E., & Vannini, A. (2018). Structural  
594 basis of RNA polymerase III transcription initiation. *Nature*, *553*(7688), 301-306. doi:  
595 10.1038/nature25441
- 596 Adams, P. D., Afonine, P. V., Bunkoczi, G., Chen, V. B., Davis, I. W., Echols, N., . . . Zwart,  
597 P. H. (2010). PHENIX: a comprehensive Python-based system for macromolecular  
598 structure solution. *Acta Crystallogr D Biol Crystallogr*, *66*(Pt 2), 213-221. doi:  
599 10.1107/S0907444909052925
- 600 Albert, B., Leger-Silvestre, I., Normand, C., Ostermaier, M. K., Perez-Fernandez, J., Panov,  
601 K. I., . . . Gadál, O. (2011). RNA polymerase I-specific subunits promote polymerase  
602 clustering to enhance the rRNA gene transcription cycle. *J Cell Biol*, *192*(2), 277-293.  
603 doi: 10.1083/jcb.201006040
- 604 Anderson, S. J., Sikes, M. L., Zhang, Y., French, S. L., Salgia, S., Beyer, A. L., . . .  
605 Schneider, D. A. (2011). The transcription elongation factor Spt5 influences  
606 transcription by RNA polymerase I positively and negatively. *J Biol Chem*, *286*(21),  
607 18816-18824. doi: 10.1074/jbc.M110.202101
- 608 Appling, F. D., Lucius, A. L., & Schneider, D. A. (2015). Transient-State Kinetic Analysis of  
609 the RNA Polymerase I Nucleotide Incorporation Mechanism. *Biophys J*, *109*(11),  
610 2382-2393. doi: 10.1016/j.bpj.2015.10.037
- 611 Appling, F. D., Schneider, D. A., & Lucius, A. L. (2017). Multisubunit RNA Polymerase  
612 Cleavage Factors Modulate the Kinetics and Energetics of Nucleotide Incorporation:  
613 An RNA Polymerase I Case Study. *Biochemistry*, *56*(42), 5654-5662. doi:  
614 10.1021/acs.biochem.7b00370
- 615 Barnes, C. O., Calero, M., Malik, I., Graham, B. W., Spahr, H., Lin, G., . . . Calero, G. (2015).  
616 Crystal Structure of a Transcribing RNA Polymerase II Complex Reveals a Complete  
617 Transcription Bubble. *Mol Cell*, *59*(2), 258-269. doi: 10.1016/j.molcel.2015.06.034
- 618 Beckouet, F., Mariotte-Labarre, S., Peyroche, G., Nogi, Y., & Thuriaux, P. (2011). Rpa43  
619 and its partners in the yeast RNA polymerase I transcription complex. *FEBS Lett*,  
620 *585*(21), 3355-3359. doi: 10.1016/j.febslet.2011.09.011
- 621 Bernecky, C., Herzog, F., Baumeister, W., Plitzko, J. M., & Cramer, P. (2016). Structure of  
622 transcribing mammalian RNA polymerase II. *Nature*, *529*(7587), 551-554. doi:  
623 10.1038/nature16482
- 624 Bernecky, C., Plitzko, J. M., & Cramer, P. (2017). Structure of a transcribing RNA  
625 polymerase II-DSIF complex reveals a multidentate DNA-RNA clamp. *Nat Struct Mol*  
626 *Biol*, *24*(10), 809-815. doi: 10.1038/nsmb.3465
- 627 Cardone, G., Heymann, J. B., & Steven, A. C. (2013). One number does not fit all: mapping  
628 local variations in resolution in cryo-EM reconstructions. *J Struct Biol*, *184*(2), 226-  
629 236. doi: 10.1016/j.jsb.2013.08.002
- 630 Chen, V. B., Arendall, W. B., 3rd, Headd, J. J., Keedy, D. A., Immormino, R. M., Kapral, G.  
631 J., . . . Richardson, D. C. (2010). MolProbity: all-atom structure validation for  
632 macromolecular crystallography. *Acta Crystallogr D Biol Crystallogr*, *66*(Pt 1), 12-21.  
633 doi: 10.1107/S0907444909042073
- 634 Cheung, A. C., & Cramer, P. (2011). Structural basis of RNA polymerase II backtracking,  
635 arrest and reactivation. *Nature*, *471*(7337), 249-253. doi: 10.1038/nature09785
- 636 Cheung, A. C., Sainsbury, S., & Cramer, P. (2011). Structural basis of initial RNA  
637 polymerase II transcription. *EMBO J*, *30*(23), 4755-4763. doi:  
638 10.1038/emboj.2011.396
- 639 Darrière T, P. M., Chauvier A, Genty T, Audibert S, Dez C, Leger-Silvestre I, Normand C,  
640 Calvo O, Fernández-Tornero C, Tschochner H, Gadál O. (2018). Genetic analysis of  
641 RNA polymerase I unveils new role of the Rpa12 subunit during transcription.  
642 *bioRxiv*. doi: <https://doi.org/10.1101/307199>

- 643 Ehara, H., Yokoyama, T., Shigematsu, H., Yokoyama, S., Shirouzu, M., & Sekine, S. I.  
644 (2017). Structure of the complete elongation complex of RNA polymerase II with  
645 basal factors. *Science*, 357(6354), 921-924. doi: 10.1126/science.aan8552
- 646 Emsley, P., & Cowtan, K. (2004). Coot: model-building tools for molecular graphics. *Acta*  
647 *Crystallogr D Biol Crystallogr*, 60(Pt 12 Pt 1), 2126-2132. doi:  
648 10.1107/S0907444904019158
- 649 Engel, C., Gubbey, T., Neyer, S., Sainsbury, S., Oberthuer, C., Baejen, C., . . . Cramer, P.  
650 (2017). Structural Basis of RNA Polymerase I Transcription Initiation. *Cell*, 169(1),  
651 120-131 e122. doi: 10.1016/j.cell.2017.03.003
- 652 Engel, C., Plitzko, J., & Cramer, P. (2016). RNA polymerase I-Rrn3 complex at 4.8 Å  
653 resolution. *Nat Commun*, 7, 12129. doi: 10.1038/ncomms12129
- 654 Engel, C., Sainsbury, S., Cheung, A. C., Kostrewa, D., & Cramer, P. (2013). RNA  
655 polymerase I structure and transcription regulation. *Nature*, 502(7473), 650-655. doi:  
656 10.1038/nature12712
- 657 Fernandez-Tornero, C., Moreno-Morcillo, M., Rashid, U. J., Taylor, N. M., Ruiz, F. M.,  
658 Gruene, T., . . . Muller, C. W. (2013). Crystal structure of the 14-subunit RNA  
659 polymerase I. *Nature*, 502(7473), 644-649. doi: 10.1038/nature12636
- 660 Gadal, O., Mariotte-Labarre, S., Chedin, S., Quemeneur, E., Carles, C., Sentenac, A., &  
661 Thuriaux, P. (1997). A34.5, a nonessential component of yeast RNA polymerase I,  
662 cooperates with subunit A14 and DNA topoisomerase I to produce a functional rRNA  
663 synthesis machine. *Mol Cell Biol*, 17(4), 1787-1795.
- 664 Geiger, S. R., Lorenzen, K., Schrieck, A., Hanecker, P., Kostrewa, D., Heck, A. J., &  
665 Cramer, P. (2010). RNA polymerase I contains a TFIIIF-related DNA-binding  
666 subcomplex. *Mol Cell*, 39(4), 583-594. doi: 10.1016/j.molcel.2010.07.028
- 667 Han, Y., Yan, C., Nguyen, T. H. D., Jackobel, A. J., Ivanov, I., Knutson, B. A., & He, Y.  
668 (2017). Structural mechanism of ATP-independent transcription initiation by RNA  
669 polymerase I. *Elife*, 6. doi: 10.7554/eLife.27414
- 670 He, Y., Yan, C., Fang, J., Inouye, C., Tjian, R., Ivanov, I., & Nogales, E. (2016). Near-atomic  
671 resolution visualization of human transcription promoter opening. *Nature*, 533(7603),  
672 359-365. doi: 10.1038/nature17970
- 673 Hemming, S. A., Jansma, D. B., Macgregor, P. F., Goryachev, A., Friesen, J. D., & Edwards,  
674 A. M. (2000). RNA polymerase II subunit Rpb9 regulates transcription elongation in  
675 vivo. *J Biol Chem*, 275(45), 35506-35511. doi: 10.1074/jbc.M004721200
- 676 Hoffmann, N. A., Jakobi, A. J., Moreno-Morcillo, M., Glatt, S., Kosinski, J., Hagen, W. J., . . .  
677 Muller, C. W. (2015). Molecular structures of unbound and transcribing RNA  
678 polymerase III. *Nature*, 528(7581), 231-236. doi: 10.1038/nature16143
- 679 Huang, X., Wang, D., Weiss, D. R., Bushnell, D. A., Kornberg, R. D., & Levitt, M. (2010).  
680 RNA polymerase II trigger loop residues stabilize and position the incoming  
681 nucleotide triphosphate in transcription. *Proc Natl Acad Sci U S A*, 107(36), 15745-  
682 15750. doi: 10.1073/pnas.1009898107
- 683 Huet, J., Buhler, J. M., Sentenac, A., & Fromageot, P. (1975). Dissociation of two  
684 polypeptide chains from yeast RNA polymerase A. *Proc Natl Acad Sci U S A*, 72(8),  
685 3034-3038.
- 686 Huet, J., Dezelee, S., Iborra, F., Buhler, J. M., Sentenac, A., & Fromageot, P. (1976). Further  
687 characterization of yeast RNA polymerases. Effect of subunits removal. *Biochimie*,  
688 58(1-2), 71-80.
- 689 Kettenberger, H., Armache, K. J., & Cramer, P. (2004). Complete RNA polymerase II  
690 elongation complex structure and its interactions with NTP and TFIIIS. *Mol Cell*, 16(6),  
691 955-965. doi: 10.1016/j.molcel.2004.11.040
- 692 Khatler, H., Vorlander, M. K., & Muller, C. W. (2017). RNA polymerase I and III: similar yet  
693 unique. *Curr Opin Struct Biol*, 47, 88-94. doi: 10.1016/j.sbi.2017.05.008
- 694 Kimanius, D., Forsberg, B. O., Scheres, S. H., & Lindahl, E. (2016). Accelerated cryo-EM  
695 structure determination with parallelisation using GPUs in RELION-2. *Elife*, 5. doi:  
696 10.7554/eLife.18722

- 697 Knippa, K., & Peterson, D. O. (2013). Fidelity of RNA polymerase II transcription: Role of  
698 Rpb9 [corrected] in error detection and proofreading. *Biochemistry*, *52*(44), 7807-  
699 7817. doi: 10.1021/bi4009566
- 700 Kuhn, C. D., Geiger, S. R., Baumli, S., Gartmann, M., Gerber, J., Jennebach, S., . . .  
701 Cramer, P. (2007). Functional architecture of RNA polymerase I. *Cell*, *131*(7), 1260-  
702 1272. doi: 10.1016/j.cell.2007.10.051
- 703 Li, S., Ding, B., Chen, R., Ruggiero, C., & Chen, X. (2006). Evidence that the transcription  
704 elongation function of Rpb9 is involved in transcription-coupled DNA repair in  
705 *Saccharomyces cerevisiae*. *Mol Cell Biol*, *26*(24), 9430-9441. doi:  
706 10.1128/MCB.01656-06
- 707 Liljelund, P., Mariotte, S., Buhler, J. M., & Sentenac, A. (1992). Characterization and  
708 mutagenesis of the gene encoding the A49 subunit of RNA polymerase A in  
709 *Saccharomyces cerevisiae*. *Proc Natl Acad Sci U S A*, *89*(19), 9302-9305.
- 710 Lisica, A., Engel, C., Jahnel, M., Roldan, E., Galburt, E. A., Cramer, P., & Grill, S. W. (2016).  
711 Mechanisms of backtrack recovery by RNA polymerases I and II. *Proc Natl Acad Sci*  
712 *U S A*, *113*(11), 2946-2951. doi: 10.1073/pnas.1517011113
- 713 Milkereit, P., & Tschochner, H. (1998). A specialized form of RNA polymerase I, essential for  
714 initiation and growth-dependent regulation of rRNA synthesis, is disrupted during  
715 transcription. *EMBO J*, *17*(13), 3692-3703. doi: 10.1093/emboj/17.13.3692
- 716 Mishanina, T. V., Palo, M. Z., Nayak, D., Mooney, R. A., & Landick, R. (2017). Trigger loop  
717 of RNA polymerase is a positional, not acid-base, catalyst for both transcription and  
718 proofreading. *Proc Natl Acad Sci U S A*, *114*(26), E5103-E5112. doi:  
719 10.1073/pnas.1702383114
- 720 Moreno-Morcillo, M., Taylor, N. M., Gruene, T., Legrand, P., Rashid, U. J., Ruiz, F. M., . . .  
721 Fernandez-Tornero, C. (2014). Solving the RNA polymerase I structural puzzle. *Acta*  
722 *Crystallogr D Biol Crystallogr*, *70*(Pt 10), 2570-2582. doi:  
723 10.1107/S1399004714015788
- 724 Neyer, S., Kunz, M., Geiss, C., Hantsche, M., Hodirnau, V. V., Seybert, A., . . . Frangakis, A.  
725 S. (2016). Structure of RNA polymerase I transcribing ribosomal DNA genes. *Nature*.  
726 doi: 10.1038/nature20561
- 727 Pal, M., Ponticelli, A. S., & Luse, D. S. (2005). The role of the transcription bubble and TFIIB  
728 in promoter clearance by RNA polymerase II. *Mol Cell*, *19*(1), 101-110. doi:  
729 10.1016/j.molcel.2005.05.024
- 730 Penrod, Y., Rothblum, K., Cavanaugh, A., & Rothblum, L. I. (2015). Regulation of the  
731 association of the PAF53/PAF49 heterodimer with RNA polymerase I. *Gene*, *556*(1),  
732 61-67. doi: 10.1016/j.gene.2014.09.022
- 733 Petushkov, I., Pupov, D., Bass, I., & Kulbachinskiy, A. (2015). Mutations in the CRE pocket  
734 of bacterial RNA polymerase affect multiple steps of transcription. *Nucleic Acids Res*,  
735 *43*(12), 5798-5809. doi: 10.1093/nar/gkv504
- 736 Pilsl, M., Crucifix, C., Papai, G., Krupp, F., Steinbauer, R., Griesenbeck, J., . . . Schultz, P.  
737 (2016). Structure of the initiation-competent RNA polymerase I and its implication for  
738 transcription. *Nat Commun*, *7*, 12126. doi: 10.1038/ncomms12126
- 739 Plaschka, C., Hantsche, M., Dienemann, C., Burzinski, C., Plitzko, J., & Cramer, P. (2016).  
740 Transcription initiation complex structures elucidate DNA opening. *Nature*,  
741 *533*(7603), 353-358. doi: 10.1038/nature17990
- 742 Rohou, A., & Grigorieff, N. (2015). CTFFIND4: Fast and accurate defocus estimation from  
743 electron micrographs. *J Struct Biol*, *192*(2), 216-221. doi: 10.1016/j.jsb.2015.08.008
- 744 Rossbach, S., & Ochsenfeld, C. (2017). Quantum-Chemical Study of the Discrimination  
745 against dNTP in the Nucleotide Addition Reaction in the Active Site of RNA  
746 Polymerase II. *J Chem Theory Comput*, *13*(4), 1699-1705. doi:  
747 10.1021/acs.jctc.7b00157
- 748 Sadian, Y., Tafur, L., Kosinski, J., Jakobi, A. J., Wetzel, R., Buczak, K., . . . Muller, C. W.  
749 (2017). Structural insights into transcription initiation by yeast RNA polymerase I.  
750 *EMBO J*, *36*(18), 2698-2709. doi: 10.15252/embj.201796958

- 751 Scheres, S. H. (2016). Processing of Structurally Heterogeneous Cryo-EM Data in RELION.  
752 *Methods Enzymol*, 579, 125-157. doi: 10.1016/bs.mie.2016.04.012
- 753 Schneider, D. A., Michel, A., Sikes, M. L., Vu, L., Dodd, J. A., Salgia, S., . . . Nomura, M.  
754 (2007). Transcription elongation by RNA polymerase I is linked to efficient rRNA  
755 processing and ribosome assembly. *Mol Cell*, 26(2), 217-229. doi:  
756 10.1016/j.molcel.2007.04.007
- 757 Tafur, L., Sadian, Y., Hoffmann, N. A., Jakobi, A. J., Wetzell, R., Hagen, W. J. H., . . . Muller,  
758 C. W. (2016). Molecular Structures of Transcribing RNA Polymerase I. *Mol Cell*,  
759 64(6), 1135-1143. doi: 10.1016/j.molcel.2016.11.013
- 760 Torreira, E., Louro, J. A., Pazos, I., Gonzalez-Polo, N., Gil-Carton, D., Duran, A. G., . . .  
761 Fernandez-Tornero, C. (2017). The dynamic assembly of distinct RNA polymerase I  
762 complexes modulates rDNA transcription. *Elife*, 6. doi: 10.7554/eLife.20832
- 763 Van Mullem, V., Landrieux, E., Vandenhoute, J., & Thuriaux, P. (2002). Rpa12p, a  
764 conserved RNA polymerase I subunit with two functional domains. *Mol Microbiol*,  
765 43(5), 1105-1113.
- 766 Vannini, A., & Cramer, P. (2012). Conservation between the RNA polymerase I, II, and III  
767 transcription initiation machineries. *Mol Cell*, 45(4), 439-446. doi:  
768 10.1016/j.molcel.2012.01.023
- 769 Vassilyev, D. G., Vassilyeva, M. N., Zhang, J., Palangat, M., Artsimovitch, I., & Landick, R.  
770 (2007). Structural basis for substrate loading in bacterial RNA polymerase. *Nature*,  
771 448(7150), 163-168. doi: 10.1038/nature05931
- 772 Viktorovskaya, O. V., Appling, F. D., & Schneider, D. A. (2011). Yeast transcription  
773 elongation factor Spt5 associates with RNA polymerase I and RNA polymerase II  
774 directly. *J Biol Chem*, 286(21), 18825-18833. doi: 10.1074/jbc.M110.202119
- 775 Viktorovskaya, O. V., Engel, K. L., French, S. L., Cui, P., Vandeventer, P. J., Pavlovic, E. M.,  
776 . . . Schneider, D. A. (2013). Divergent contributions of conserved active site residues  
777 to transcription by eukaryotic RNA polymerases I and II. *Cell Rep*, 4(5), 974-984. doi:  
778 10.1016/j.celrep.2013.07.044
- 779 Vorlander, M. K., Khatler, H., Wetzell, R., Hagen, W. J. H., & Muller, C. W. (2018). Molecular  
780 mechanism of promoter opening by RNA polymerase III. *Nature*, 553(7688), 295-  
781 300. doi: 10.1038/nature25440
- 782 Vvedenskaya, I. O., Vahedian-Movahed, H., Bird, J. G., Knoblauch, J. G., Goldman, S. R.,  
783 Zhang, Y., . . . Nickels, B. E. (2014). Interactions between RNA polymerase and the  
784 "core recognition element" counteract pausing. *Science*, 344(6189), 1285-1289. doi:  
785 10.1126/science.1253458
- 786 Vvedenskaya, I. O., Vahedian-Movahed, H., Zhang, Y., Taylor, D. M., Ebright, R. H., &  
787 Nickels, B. E. (2016). Interactions between RNA polymerase and the core recognition  
788 element are a determinant of transcription start site selection. *Proc Natl Acad Sci U S*  
789 *A*, 113(21), E2899-2905. doi: 10.1073/pnas.1603271113
- 790 Wang, D., Bushnell, D. A., Westover, K. D., Kaplan, C. D., & Kornberg, R. D. (2006).  
791 Structural basis of transcription: role of the trigger loop in substrate specificity and  
792 catalysis. *Cell*, 127(5), 941-954. doi: 10.1016/j.cell.2006.11.023
- 793 Westover, K. D., Bushnell, D. A., & Kornberg, R. D. (2004). Structural basis of transcription:  
794 nucleotide selection by rotation in the RNA polymerase II active center. *Cell*, 119(4),  
795 481-489. doi: 10.1016/j.cell.2004.10.016
- 796 Wiesler, S. C., Weinzierl, R. O., & Buck, M. (2013). An aromatic residue switch in enhancer-  
797 dependent bacterial RNA polymerase controls transcription intermediate complex  
798 activity. *Nucleic Acids Res*, 41(11), 5874-5886. doi: 10.1093/nar/gkt271
- 799 Xu, Y., Bernecky, C., Lee, C. T., Maier, K. C., Schwalb, B., Tegunov, D., . . . Cramer, P.  
800 (2017). Architecture of the RNA polymerase II-Paf1C-TFIIS transcription elongation  
801 complex. *Nat Commun*, 8, 15741. doi: 10.1038/ncomms15741
- 802 Yamamoto, K., Yamamoto, M., Hanada, K., Nogi, Y., Matsuyama, T., & Muramatsu, M.  
803 (2004). Multiple protein-protein interactions by RNA polymerase I-associated factor  
804 PAF49 and role of PAF49 in rRNA transcription. *Mol Cell Biol*, 24(14), 6338-6349.  
805 doi: 10.1128/MCB.24.14.6338-6349.2004

- 806 Zhang, Y., Feng, Y., Chatterjee, S., Tuske, S., Ho, M. X., Arnold, E., & Ebright, R. H. (2012).  
807 Structural basis of transcription initiation. *Science*, 338(6110), 1076-1080. doi:  
808 10.1126/science.1227786
- 809 Zhang, Y., Sikes, M. L., Beyer, A. L., & Schneider, D. A. (2009). The Paf1 complex is  
810 required for efficient transcription elongation by RNA polymerase I. *Proc Natl Acad*  
811 *Sci U S A*, 106(7), 2153-2158. doi: 10.1073/pnas.0812939106
- 812 Zhang, Y., Smith, A. D. t., Renfrow, M. B., & Schneider, D. A. (2010). The RNA polymerase-  
813 associated factor 1 complex (Paf1C) directly increases the elongation rate of RNA  
814 polymerase I and is required for efficient regulation of rRNA synthesis. *J Biol Chem*,  
815 285(19), 14152-14159. doi: 10.1074/jbc.M110.115220
- 816 Zheng, S. Q., Palovcak, E., Armache, J. P., Verba, K. A., Cheng, Y., & Agard, D. A. (2017).  
817 MotionCor2: anisotropic correction of beam-induced motion for improved cryo-  
818 electron microscopy. *Nat Methods*, 14(4), 331-332. doi: 10.1038/nmeth.4193

819

820

821



## 822 **Figure Legends**

823 **Figure 1. Structure of the Pol I EC bound to GMPCPP and structural rearrangement of**  
824 **the A12.2 C-terminal domain. A.** In Pol I\*, the A12.2 C-terminal domain (A12.2C) can bind  
825 to an Rpb9-like site next to the A135 ED1, which clashes with the position of the A49-A34.5  
826 heterodimer in Pol I. Density for the DNA is from the Pol I (core) EC (upstream DNA)  
827 reconstruction (unsharpened), while the density for the A12.2C is from the Pol I\* EC  
828 (+GMPCPP) map. **B.** Two interfaces are differently arranged in Pol I\* versus Pol I. Both  
829 A34.5 and A12.2 can bind to the A135 External Domain 1 (ED1), and A34.5 and the N-  
830 terminal tail of A135 (A135-Nt) can bind to the Hybrid Binding domain (HB). **C.** Comparison  
831 between the apo (left), Pol I EC (middle) and Pol I\* EC (right) reveals that the A12.2C can  
832 alternate between TFIIIS-like (apo) or Rpb9-like (right) positions. Movement of the A12.2C is  
833 around a hinge at residue 67, indicated in the Pol I EC, where the A12.2C is disordered and  
834 not observed. The position of the ED1 and HB interaction surfaces are indicated in the Pol I  
835 EC. A12.2 is shown as ribbon diagram and yellow surface for easier visualization. **D.**  
836 Specific interactions of the ED1 with either A12.2C (Pol I\*, top) or A34.5 (Pol I, bottom). **E.**  
837 Specific interactions of the HB with either A135-Nt (Pol I\*, top) or A34.5 (Pol I, bottom).  
838 Densities shown for panels D and E are from the sharpened Pol I\* and Pol I EC  
839 (+GMPCPP).

840 **Figure 2. Comparison of the positions of the C-terminal domains of Pol I A12.2, Pol II**  
841 **Rbp9 and Pol III C11.** The position of A12.2 (A), Rpb9 (B) or C11 (C) are shown in yellow  
842 for Pol I\*, Pol II and Pol III, respectively. While the ED2 is structurally more conserved (light  
843 sea green color), the ED1 in Pol II and Pol III are larger than the Pol I ED1 (red). The  
844 structure of the ED1 determines the binding mode of Pol I A12.2C and Pol II Rpb9C, while in  
845 Pol III the presence of C53 induces a different binding site for C11C far from the ED. The  
846 position of the N-terminal tail of the second largest subunit is also indicated for each  
847 polymerase.

848 **Figure 3. Density for the DNA-RNA hybrid, GMPCPP and its interactions with active**  
849 **site residues.** GMPCPP is bound by conserved, identical residues in Pol I and Pol II. These  
850 include two arginines that interact with the phosphate (R714 and R957), a leucine from the  
851 trigger loop that stacks against the DNA base (L1202), and R591 and N625 which recognize  
852 the 2'- and 3'-OH groups, respectively. The "gating tyrosine" (Y717), involved in RNA  
853 positioning during backtracking (Cheung & Cramer, 2011), and K916 and K924, which bind  
854 the 3'-end of the RNA are also indicated. Residues are shown in grey (A190) or tan (A135)  
855 for Pol I, while those in Pol II in dark green, and in Pol III in light green. Density for the DNA-  
856 RNA hybrid is from the sharpened, Pol I (core) EC (+GMPCPP) reconstruction, while the

857 GMPCPP is from the same reconstruction but from the unsharpened/unmasked map.  
858 Density for L1202 is shown at a lower threshold.

859 **Figure 4. Interactions and stabilization of the transcription bubble in Pol I. A.** Density  
860 for the full DNA/RNA transcription scaffold from the focused classification class is shown,  
861 next to the Pol I elements involved in binding the nucleic acids. The dotted boxes indicate  
862 the upstream and downstream boundaries of the transcription bubble. **B.** In Pol I, the  
863 “upstream arch” is composed of the open fork loop 1 (FL1) and loop A, while the rudder and  
864 the A49 linker helix only allow the passage of the single stranded non-template (ssNT) in a  
865 narrow cavity in between these elements. **C.** The upstream boundary of the transcription  
866 bubble in Pol II is determined by the rudder and closed FL1, which form an “upstream arch”.  
867 The corresponding regions to loop A and loop B are also indicated with numbering of the  
868 Rpb2 subunit. **D.** In the downstream edge of the transcription bubble, the +2 base of the NT  
869 strand is flipped into a pocket formed by FL2 and loop B (“A135 pocket”). These elements  
870 interact with the nucleotide through R219, R225 and the conserved D395. **E.** These  
871 interactions also position the +1 base next to F508 from FL2 (top), resembling the interaction  
872 of the +1 base with  $\beta$ W183 in bacterial Pol (bottom).

873 **Figure 5. Schematic representation of the possible physiological role of the A49-A34.5**  
874 **heterodimer in the regulation Pol I activity.** The pool of initiation-competent Pol I particles  
875 is controlled by Pol I homo-dimerization (A) and binding of Rrn3 to monomeric Pol I (B). After  
876 transcription initiation and promoter escape, during elongation, Pol I can alternate between  
877 Pol I and Pol I\* conformations. Release of the A49-A34.5 heterodimer would allow the  
878 recruitment of elongation factors (C). After dissociating from DNA, Pol I\* could bind to the  
879 A49-A34.5 heterodimer to replenish the pool of initiation-competent Pol I monomers. The  
880 concentration of A49-A34.5 heterodimer in the nucleolus might be also regulated by the  
881 nutrient status of the cell as in the mammalian system. Regulated localization of the A49-  
882 A34.5 heterodimer would serve to alter the ratio of Pol I to Pol I\* in the nucleolus, thereby  
883 controlling the initiation rates on the rDNA.

884 **Figure 1-Figure Supplement 1. Cryo-EM data and processing. A.** Representative  
885 micrograph. Scale bar = 100 nm. **B.** 2D class averages from the initial auto-picked particles.  
886 **C.** Processing pipeline. The resolution, number of particles and percentage of particles with  
887 respect to the initial number of particles after 2D classification is shown below each class.

888 **Figure 1-Figure Supplement 2. Average and local resolution estimates for the**  
889 **reconstructions. A.** Fourier-shell correlation (FSC) curves for the reconstructions. **B.** FSC  
890 curves for the models versus experimental maps. **C-F.** Local resolution estimates for all the  
891 reconstructions. **G.** Representative densities.

892 **Figure 1-Figure Supplement 3. Pol I\* and Pol I EC models.** **A.** Front view of the Pol I\* EC  
893 (left) and Pol I EC (right) models. **B.** Density for the A12.2 linker that connects the N-terminal  
894 and C-terminal Zn ribbons is visible at low threshold in the unsharpened map (Pol I\* EC map  
895 is shown). Extra density from the jaw in the region that connects to the DNA-mimicking loop  
896 (DML) is also indicated.

897 **Figure 1-Figure Supplement 4. Structure of the apo Pol I\*.** **A.** Top and front views for the  
898 apo Pol I\* model fitted into the sharpened density. The bridge helix is unfolded and shown  
899 below the models. **B.** Comparison between the A12.2 in the apo Pol I (PDB: 5m3m) and apo  
900 Pol I\*. In the apo Pol I, the A12.2C is in the TFIIIS-like position (orange), while in the apo Pol  
901 I\*, the A12.2C is in the Rpb9-like position (yellow). Movement of the A12.2C induces a shift  
902 in the N-terminal A12.2 Zn ribbon domain A12.2N, which moves towards the lobe. The  
903 flexible jaw helices also move slightly compared to the apo Pol I (orange red).

904 **Figure 4-Figure Supplement 1. Density for the single-stranded non-template strand**  
905 **(ssNT) near the rudder.** Density for the unsharpened and unmasked map for the Pol I EC  
906 focused on the upstream DNA with the fitted model shows that the density is bulky near the  
907 rudder.

908 **Figure 4-Figure Supplement 2. Conformations of the fork loop 2 in Pol II and Pol I.** **A.**  
909 Two conformations of the Fork Loop 2 (FL2) are shown for Pol II, which affect the  
910 conformation of the +2 base. The FL2 open conformation which allows +2 base  
911 flipping (Cheung & Cramer, 2011) is shown in orange (PDB: 3po2), compared to the structure  
912 from the yeast Pol II EC with a complete transcription bubble (PDB: 5c4j). **B.** For  
913 comparison, the conformation of the downstream edge of the transcription bubble in Pol I is  
914 shown, in which the +2 base is flipped into the “A135 pocket”.

915 **Figure 4-Figure Supplement 3. Conformational heterogeneity in the Pol I EC.**  
916 Classification of the pooled Pol I EC particles reveals intermediates with slight differences in  
917 the width of the cleft, flipping of the +2 base, density for GMPCPP and trigger loop (TL).  
918 Closing of the cleft is accompanied by +2 base flipping, stronger density for GMPCPP and  
919 appearance of density for A190 L1202. Flipping of DNA base +2 occurs before complete  
920 closing of the cleft by the movement of the Jaw/clamp domains towards each other (between  
921 state 3 and 4). The transition from state 1 to 5 includes the sequential movement of the  
922 protrusion and wall domains towards the clamp, the jaw/clamp movement that induces +2  
923 base flipping and closing of the cleft by movement of modules 1 and 2.

924 **Figure 5-Figure Supplement 1. A49-A34.5 heterodimer release frees the binding site**  
925 **for Spt4/5 and Paf1C.** Heterodimer binding to Pol I is destabilized by the binding of A12.2C  
926 to the ED1 (1) and binding of the A135-Nt to the HB further prevents interactions of Pol I with

927 the A34.5-Ct (2). Destabilization of the interaction between the A49-A34.5 dimerization  
928 domain and Pol I removes the A49 tWH from the upstream DNA (3). Both A49-A34.5  
929 dimerization module and A49 tWH sites are replaced by Paf1C and Spt4/5, respectively, in a  
930 manner similar to the transition from initiation to elongation in Pol II in which TFIIIF and TFIIIE  
931 are replaced by Paf1C and Spt4/5.

932 **Video 1. Jaw/clamp movement promote +2 base flipping.** +2 base flipping into the A135  
933 pocket is induced by the relative movement of the jaw and clamp domains (transition from  
934 state 3 to 4 in Figure 4-Figure Supplement 3). A morph between maps corresponding to  
935 these states is shown.

936 **Video 2. Structural rearrangements upon Pol I activation.** The transition from state 1 to 5  
937 in Figure 4-Figure Supplement 3 is shown by a morph of the maps corresponding to these  
938 states. This transition includes movement of the protrusion and wall, jaw and clamp, and  
939 complete closing of the cleft.

940

941

**Table 1.** Data collection and refinement statistics.

|                                          | <b>Pol I (core) EC<br/>+ GMPCPP</b> | <b>Pol I EC +<br/>GMPCPP</b> | <b>Pol I* EC +<br/>GMPCPP</b> | <b>Apo Pol I*</b> |
|------------------------------------------|-------------------------------------|------------------------------|-------------------------------|-------------------|
| <b>Data collection</b>                   |                                     |                              |                               |                   |
| Particle number                          | 54,017                              | 30,232                       | 182,488                       | 73,660            |
| Pixel size (Å/pix)                       | 1.04                                | 1.04                         | 1.04                          | 1.04              |
| Average resolution (Å)                   | 3.18                                | 3.42                         | 3.18                          | 3.21              |
| B-factor                                 | -44.5                               | -34.2                        | -92.9                         | -99.6             |
| EMDB code                                | EMD XXX                             | EMD XXX                      | EMD XXX                       | EMD XXX           |
| <b>Refinement statistics<sup>1</sup></b> |                                     |                              |                               |                   |
| PDB code                                 | XXXX                                | XXXX                         | XXXX                          | XXXX              |
| CC (atoms) <sup>2</sup>                  | 0.816                               | 0.804                        | 0.796                         | 0.797             |
| RMSD (bonds)                             | 0.007                               | 0.006                        | 0.006                         | 0.007             |
| RMSD (angles)                            | 1.22                                | 1.18                         | 1.18                          | 1.25              |
| Clashscore                               | 4.74                                | 5.27                         | 5.13                          | 5.17              |
| Rotamer outliers (%)                     | 0.12                                | 0.14                         | 0.09                          | 0.32              |
| C-beta deviations (%)                    | 0                                   | 0                            | 0                             | 0                 |
| <b>Ramachandran plot</b>                 |                                     |                              |                               |                   |
| Outliers (%)                             | 0                                   | 0                            | 0                             | 0                 |
| Allowed (%)                              | 4.9                                 | 5.64                         | 4.59                          | 5.48              |
| Favored (%)                              | 95.1                                | 94.36                        | 95.41                         | 94.61             |
| <b>Molprobit score</b>                   | 1.58                                | 1.67                         | 1.59                          | 1.65              |

942 <sup>1</sup> Calculated with Molprobit.

943 <sup>2</sup> From PHENIX real space refinement.

944

936 **Figure 1**

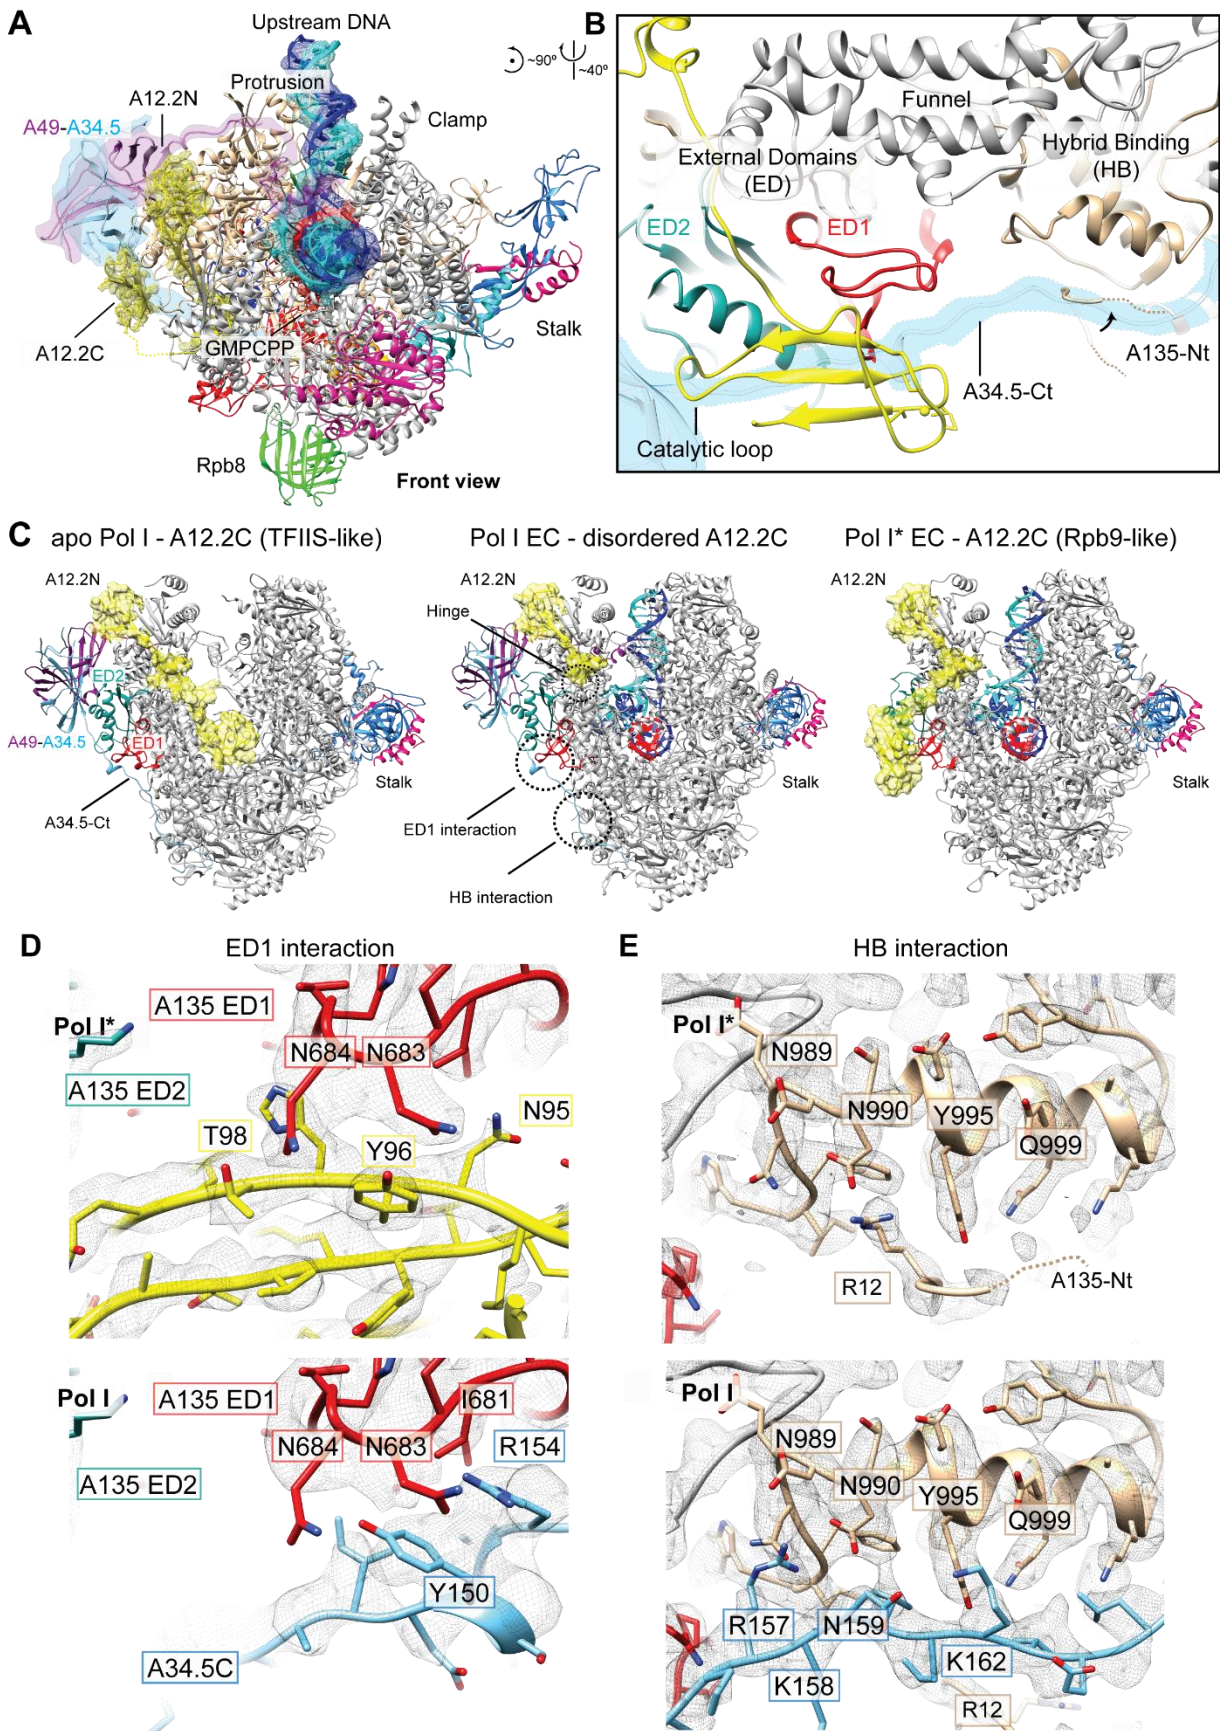

937

938 **Figure 2**

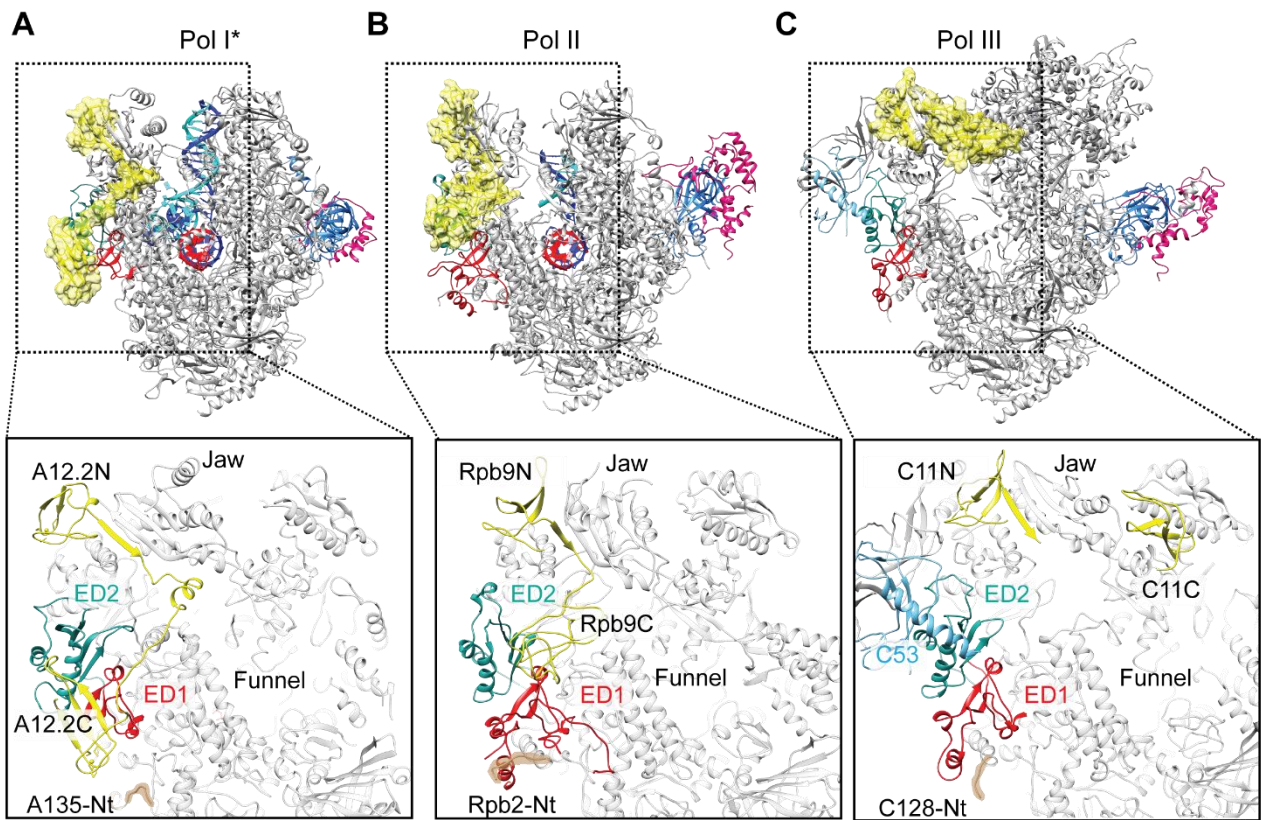

939

940

941 **Figure 3**

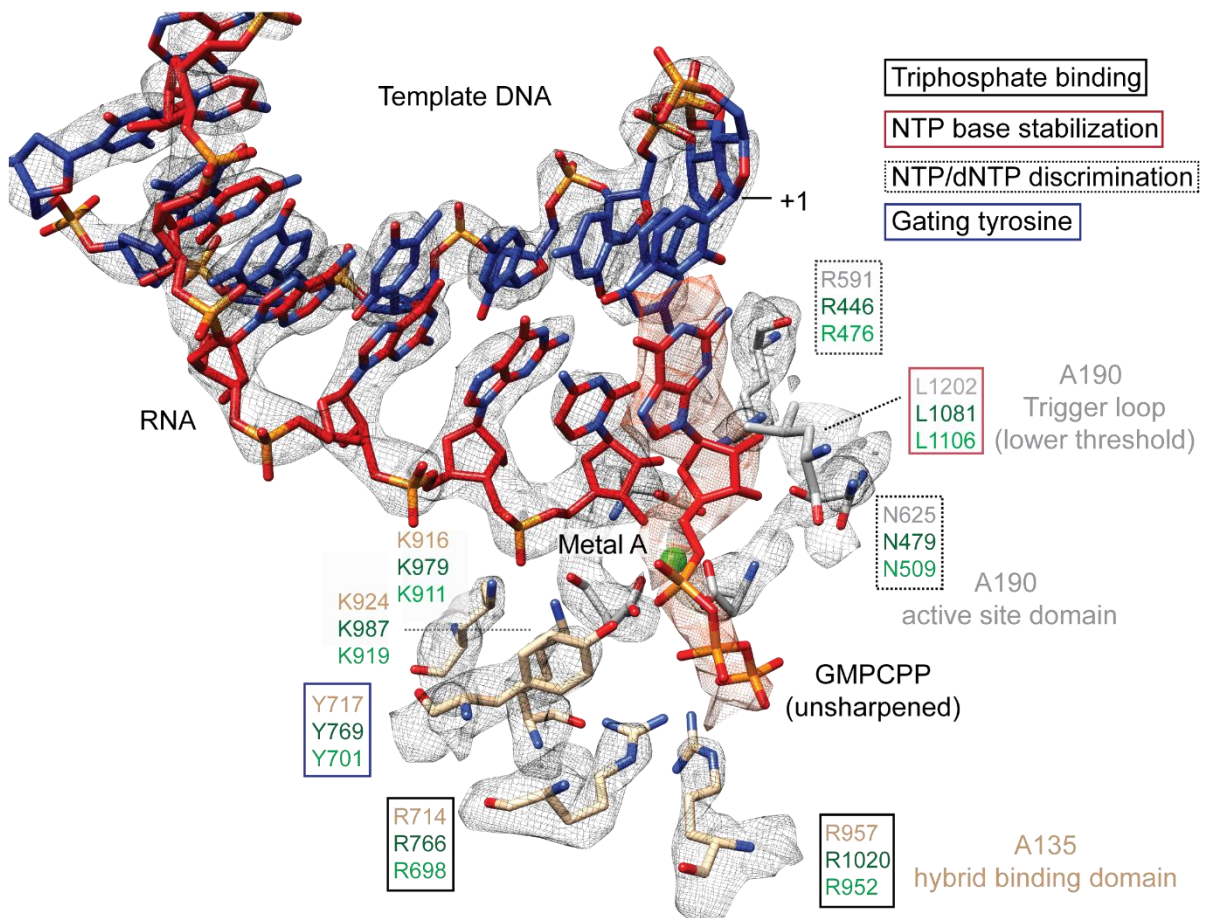

942

943



944 **Figure 4**

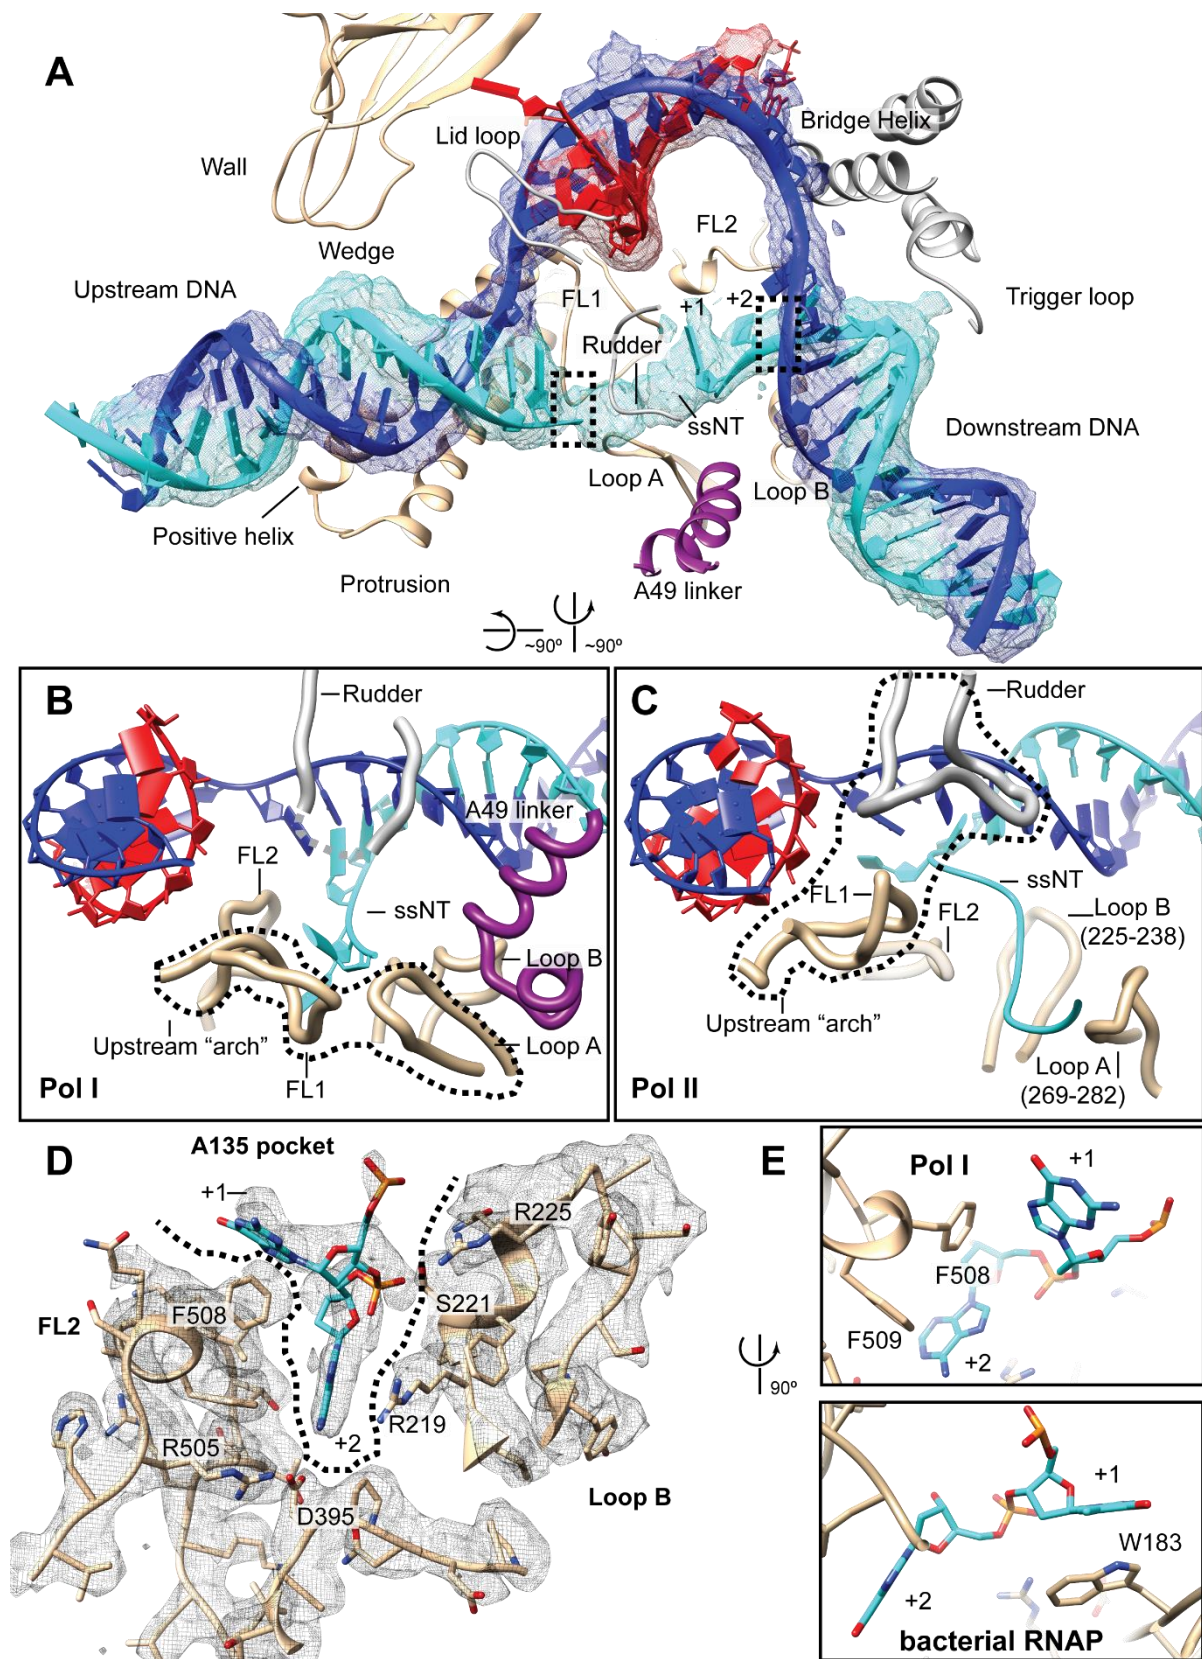

945

946

947 **Figure 5**

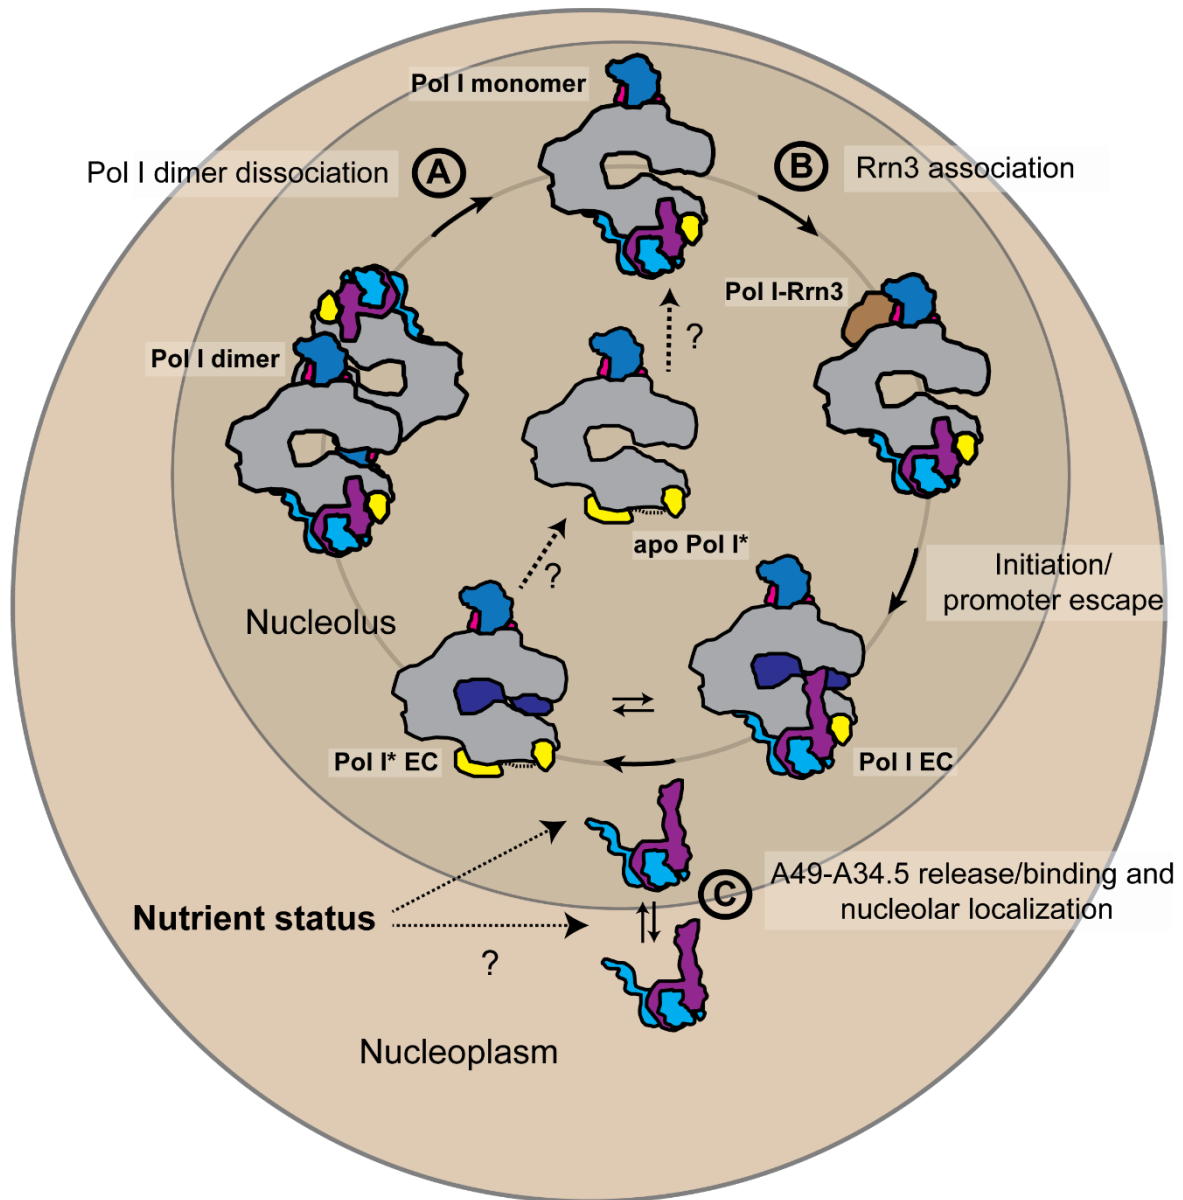

948

949 **Figure 1-Figure supplement 1**

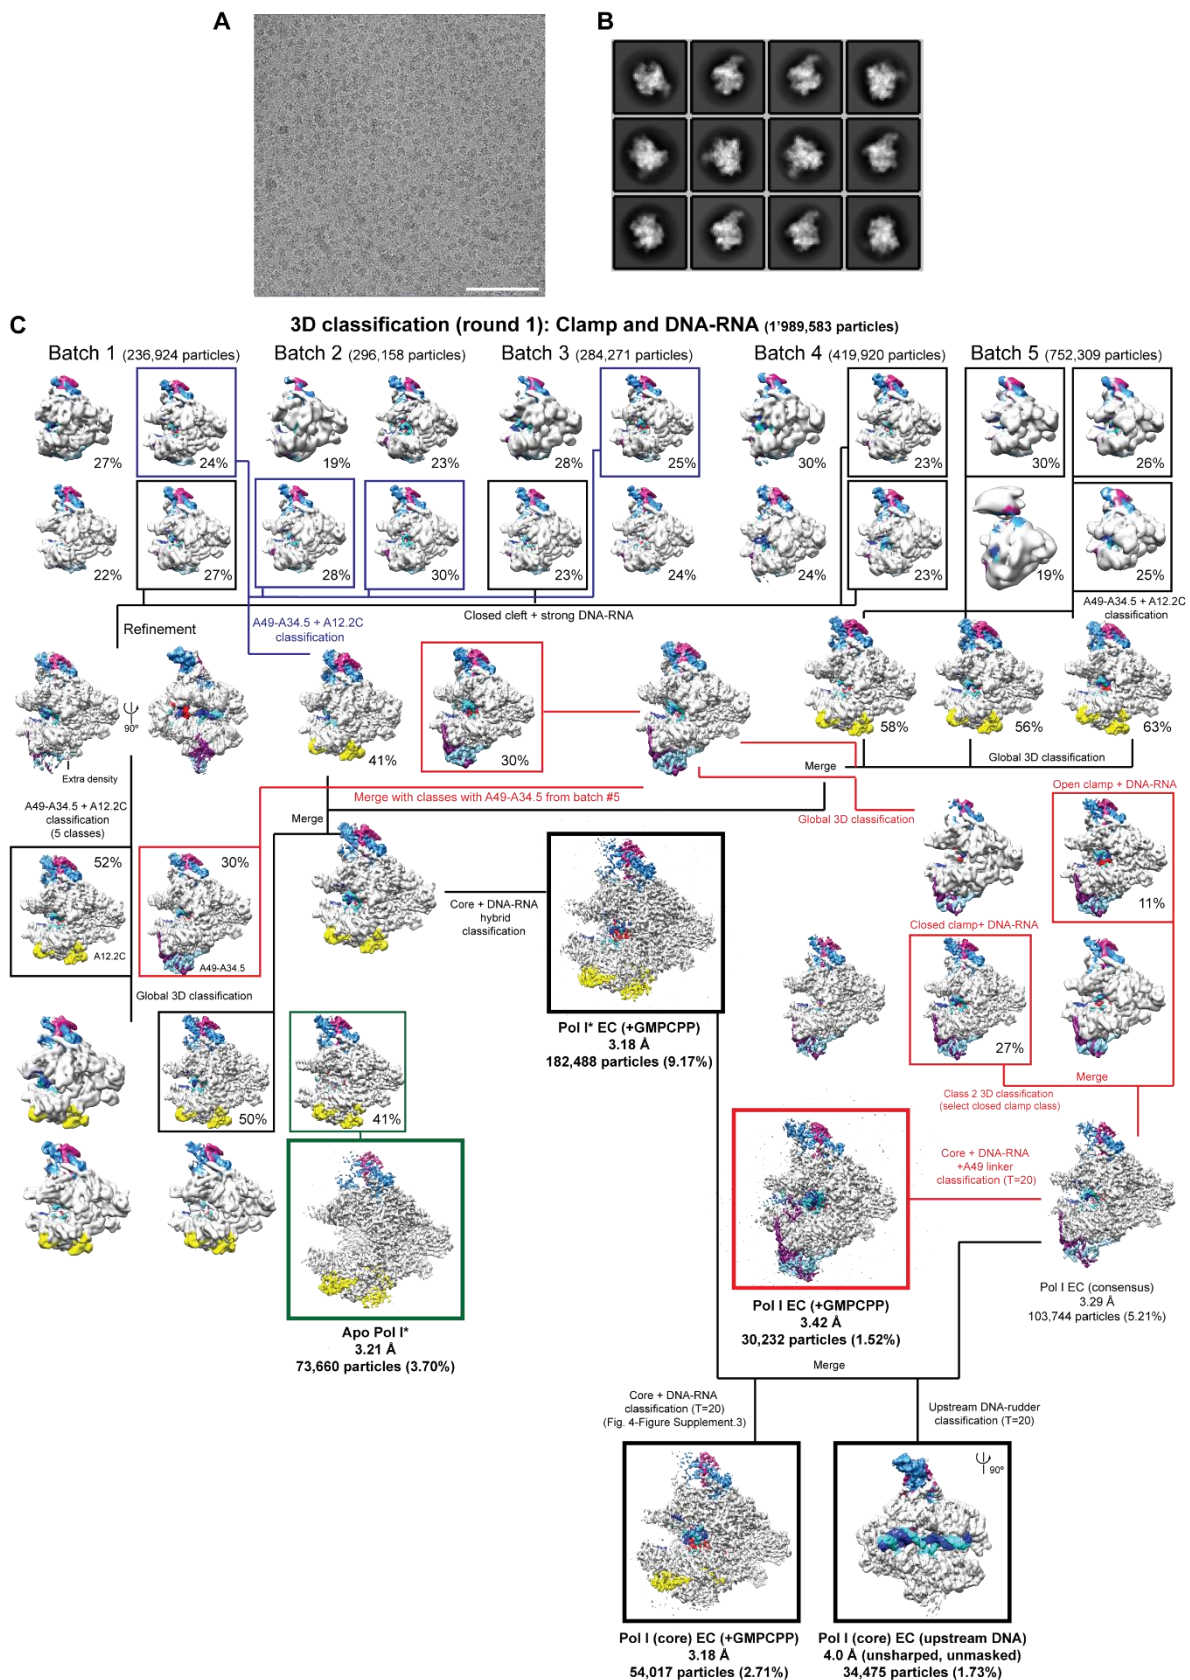

950

951 **Figure 1-Figure supplement 2**

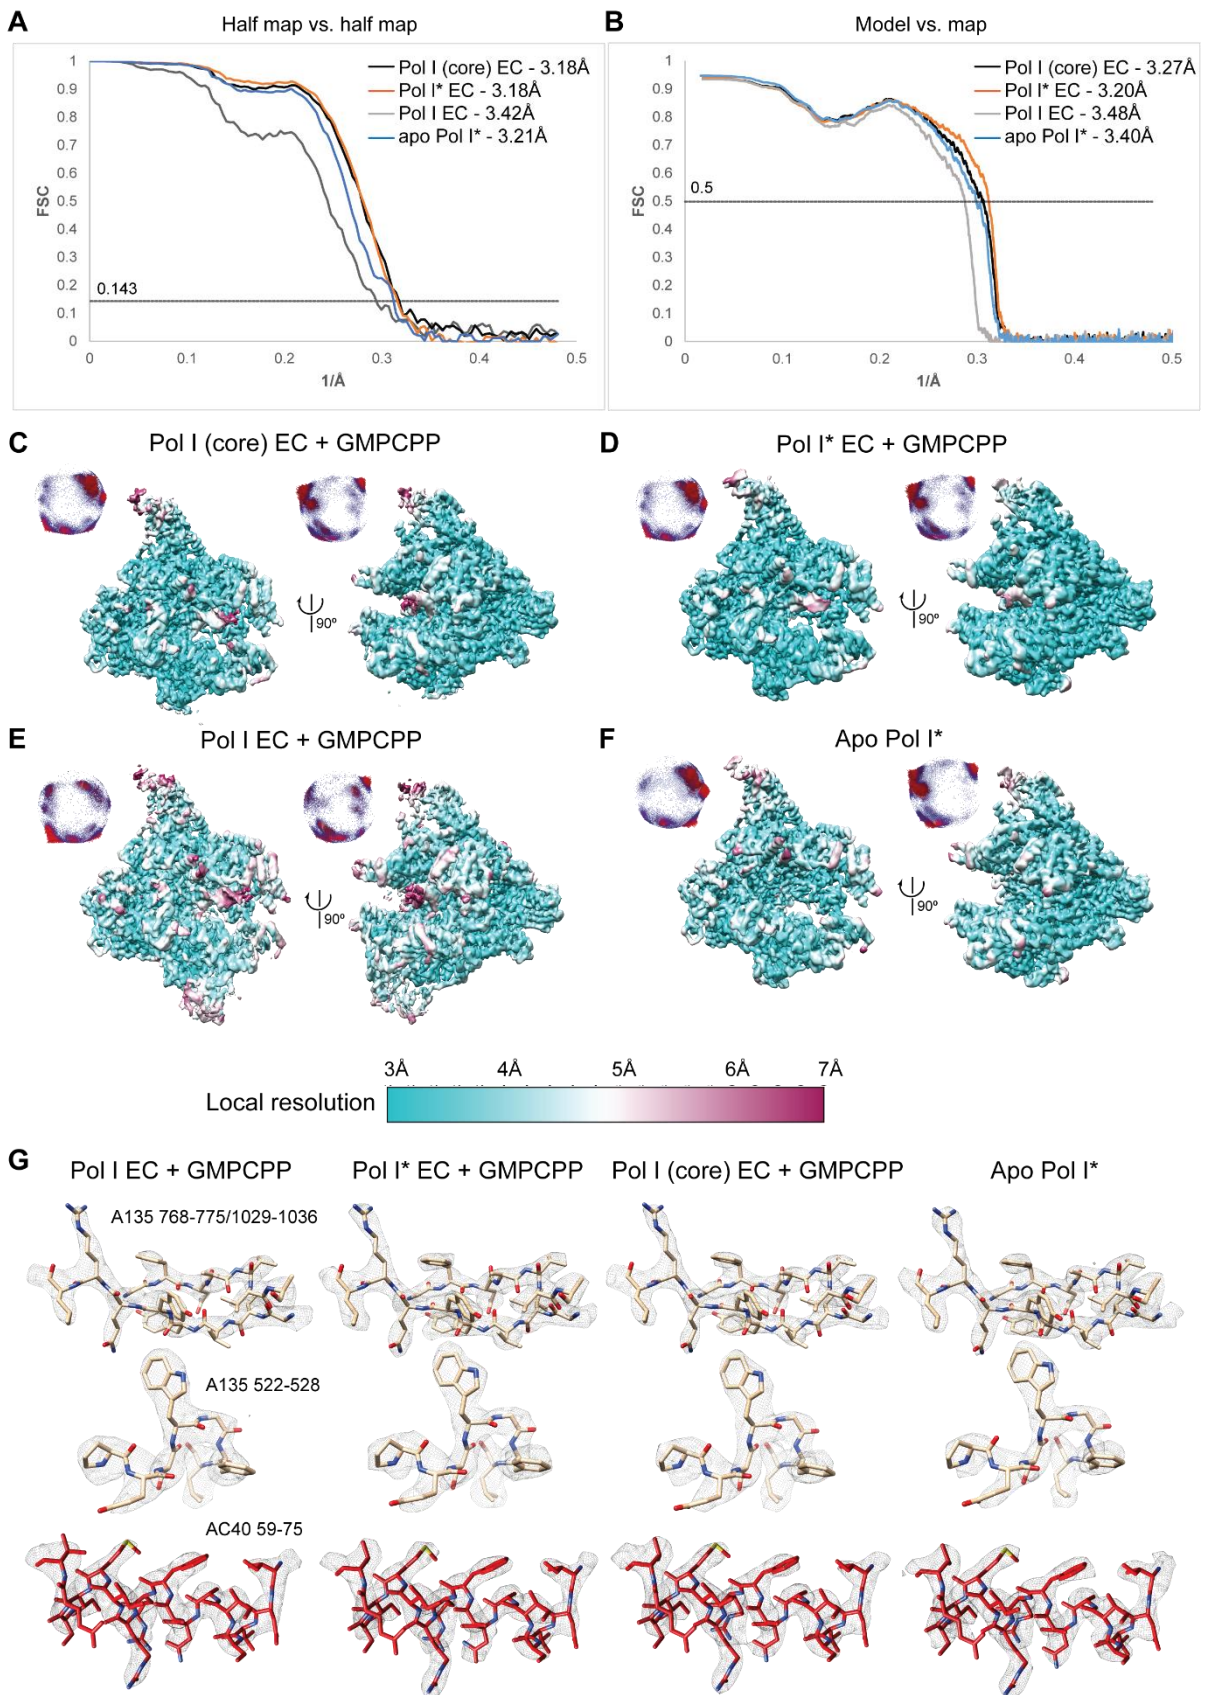

952

953 **Figure 1-Figure supplement 3**

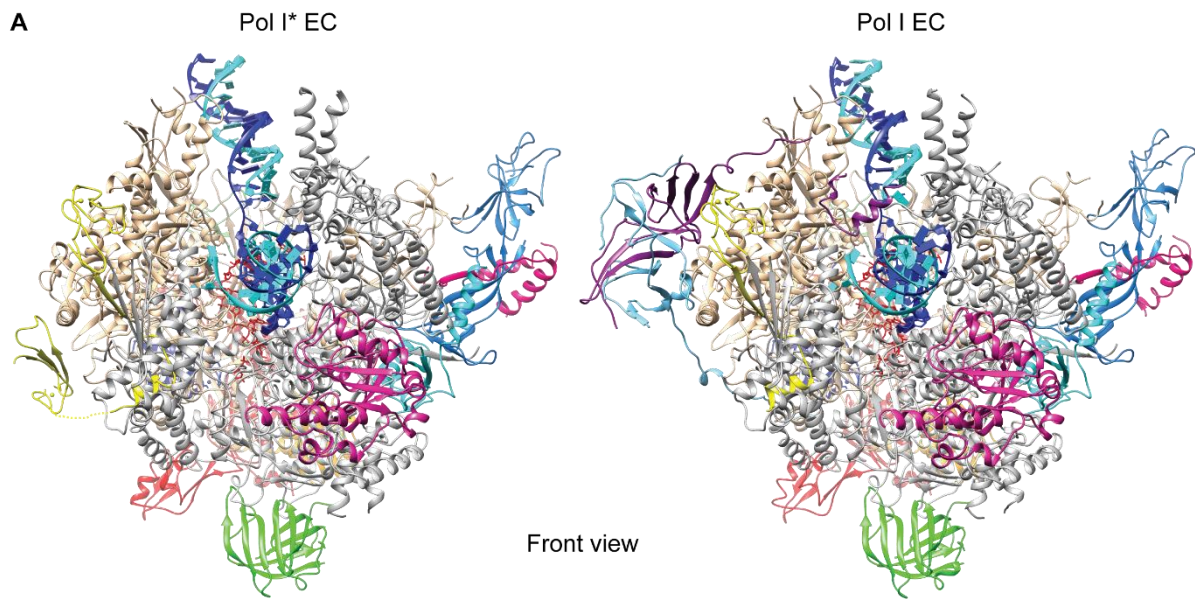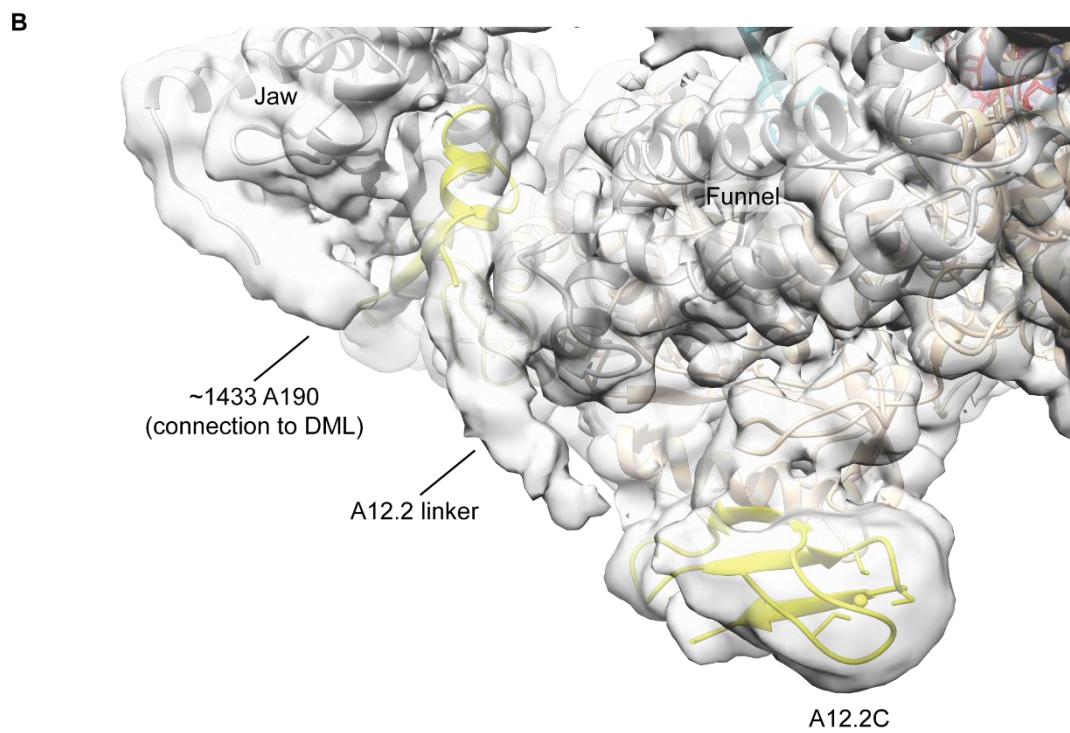

954

955 **Figure 1-Figure supplement 4**

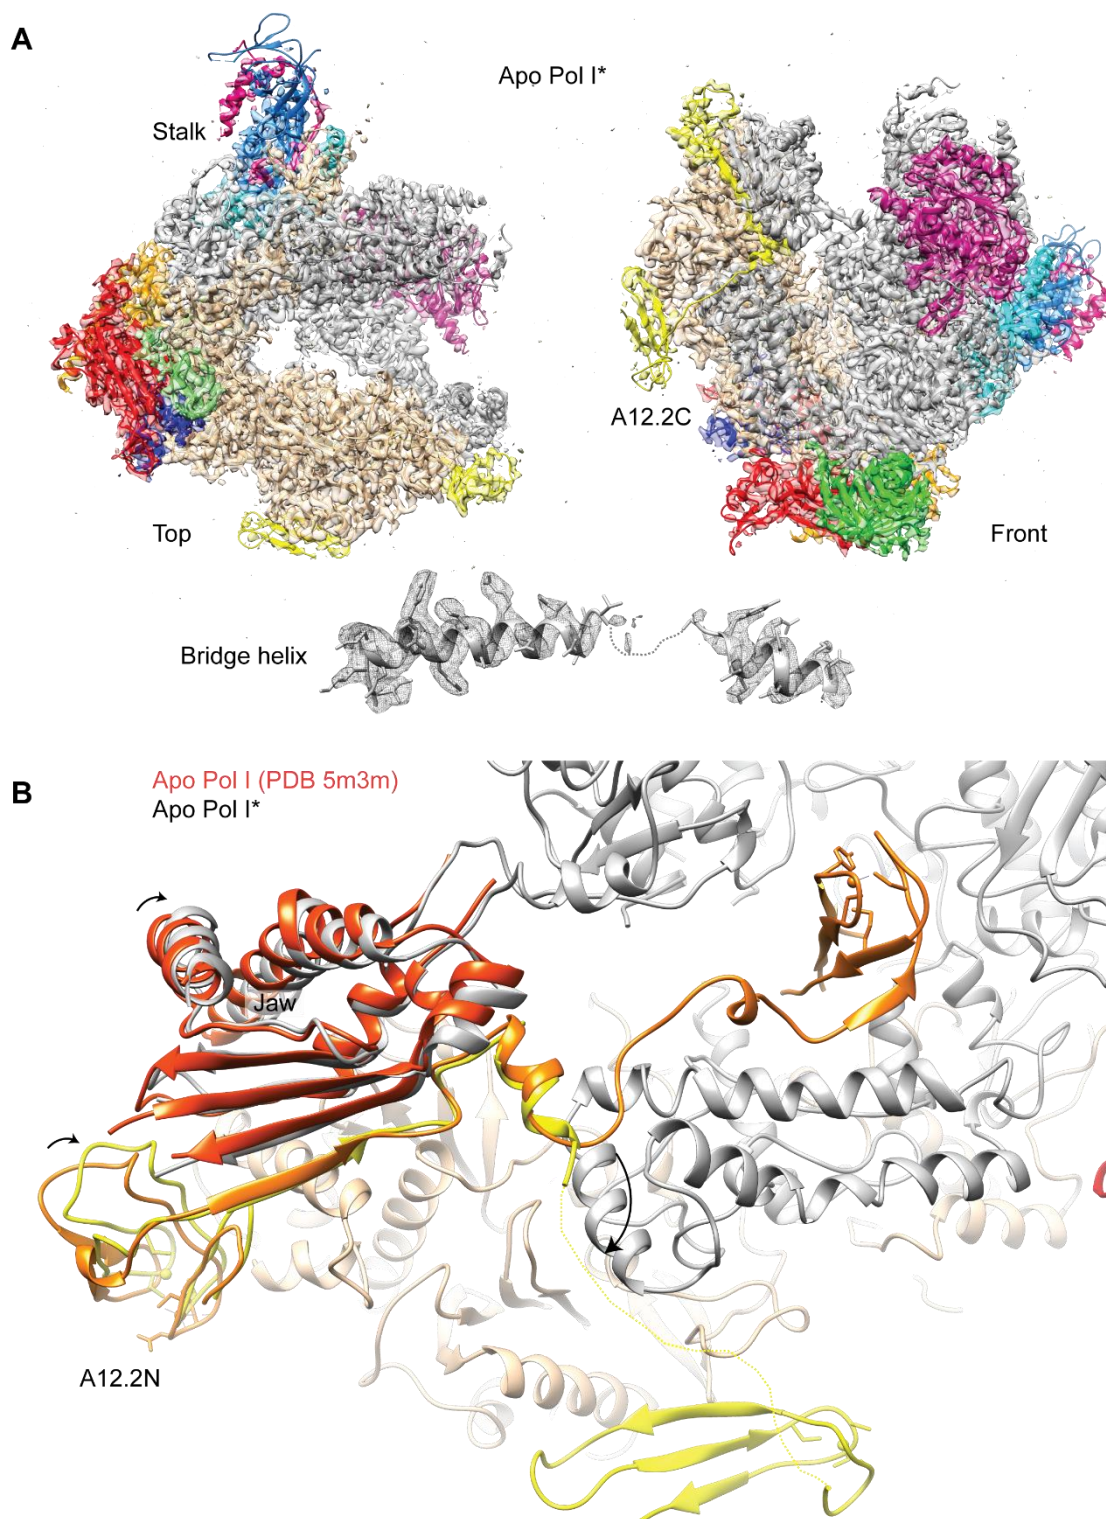

956

957

958 **Figure 4-Figure supplement 1**

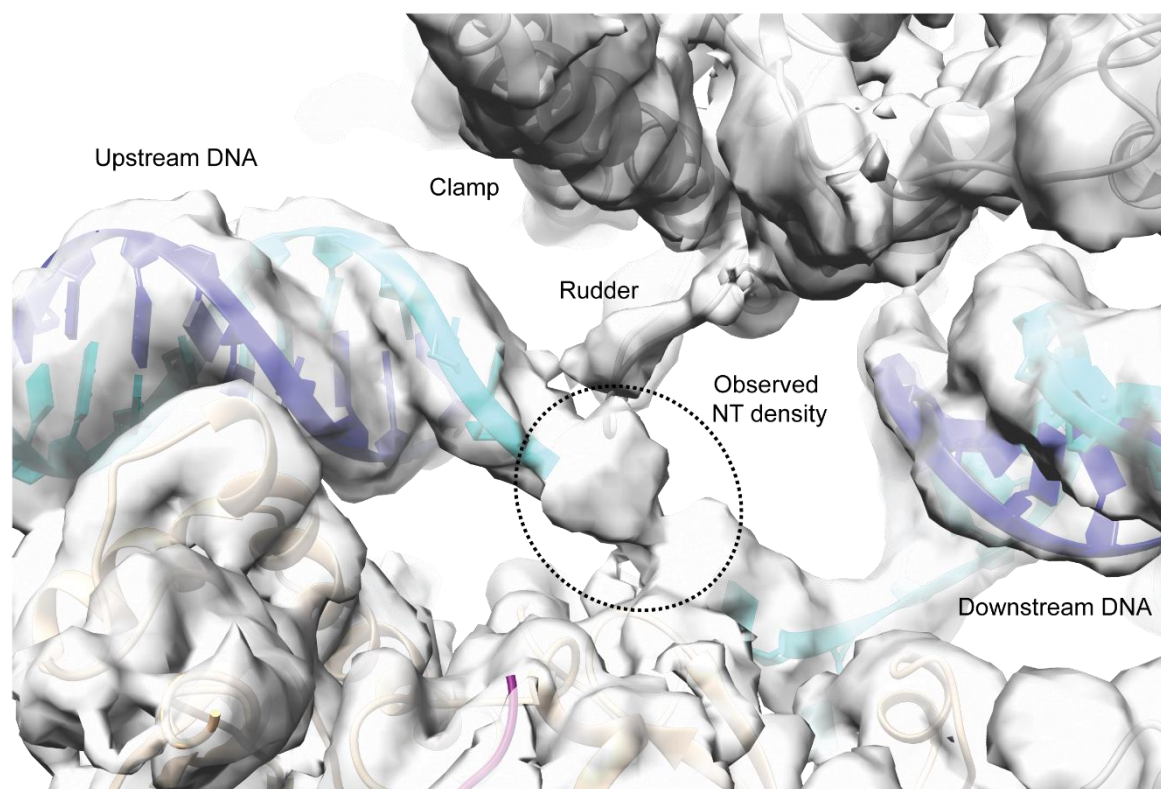

959

960 **Figure 4-Figure supplement 2**

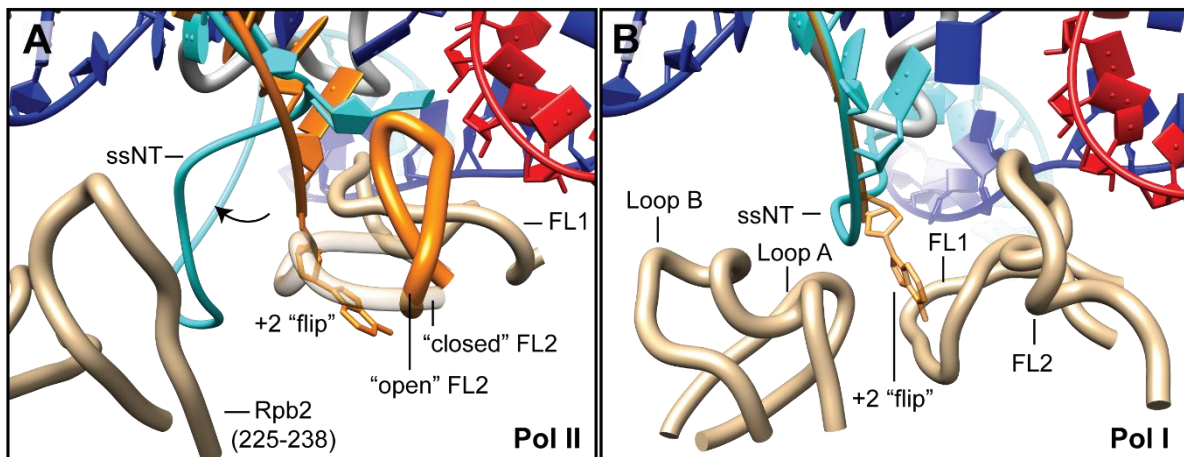

961



962 **Figure 4-Figure supplement 3**

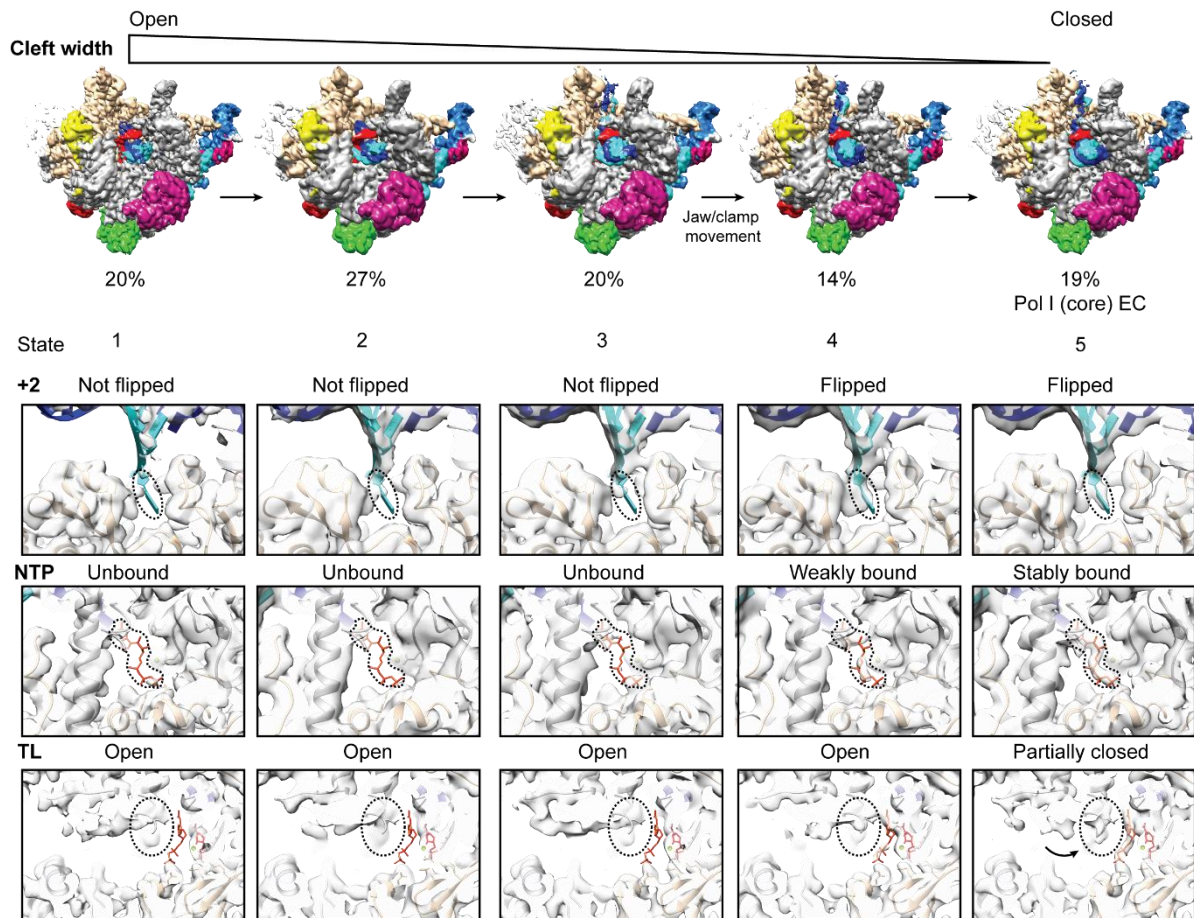

963

964

965

966 **Figure 5-Figure supplement 1**

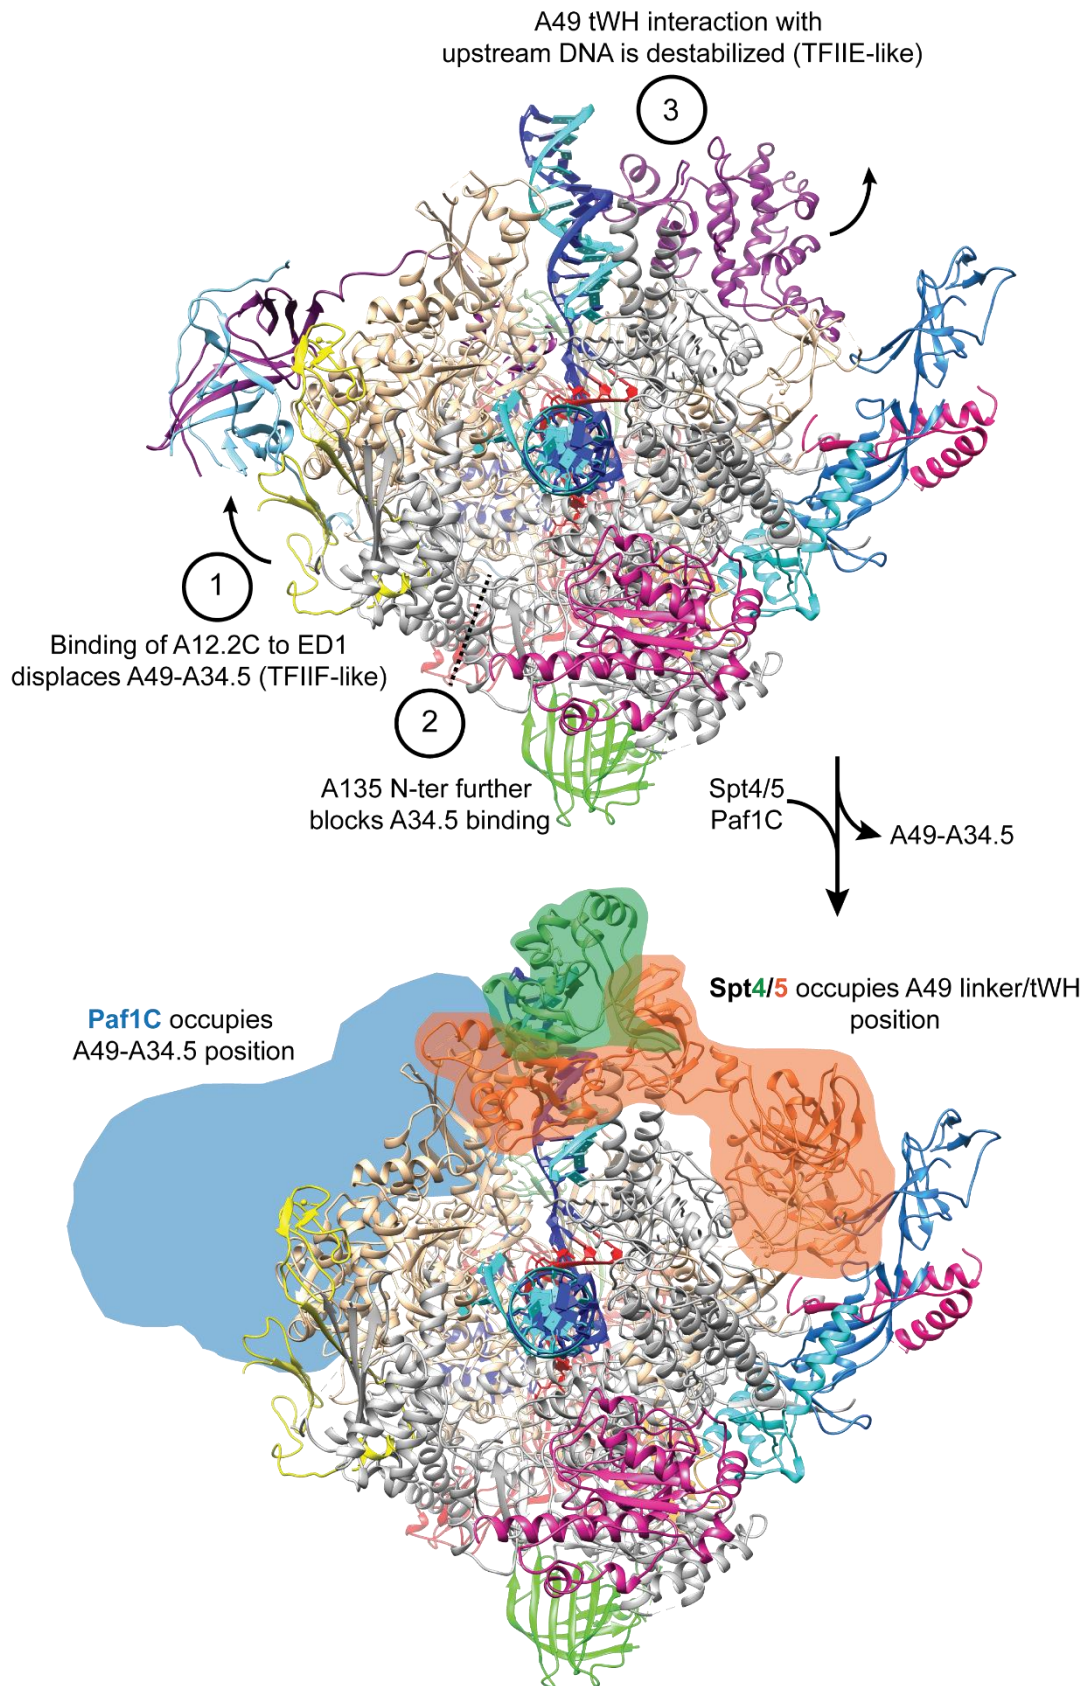

967
